# Supplementary material for: Oxidative cyclization of N-acylhydrazones. Development of highly selective turn-on fluorescent chemodosimeters for Cu2+
Source: Royal Society of Chemistry journal article supplement (doi:10.1039/b811612a), 2008-11-11

## Electronic Supplementary Information

### Oxidative Cyclization of *N*-Acylhydrazones. Development of Highly Selective Turn-on Fluorescent Chemodosimeters for Cu<sup>2+</sup>

*Ai-Fang Li, Hui He, Yi-Bin Ruan, Zhen-Chang Wen, Jin-Song Zhao, Qiu-Ju Jiang, and Yun-Bao Jiang\**

Department of Chemistry, College of Chemistry and Chemical Engineering, and the MOE Key  
Laboratory of Analytical Sciences, Xiamen University, Xiamen 361005, China

E-mail: [ybjiang@xmu.edu.cn](mailto:ybjiang@xmu.edu.cn); Tel / Fax : +86 592 2185662

|                                                                                                                                                                                              |     |
|----------------------------------------------------------------------------------------------------------------------------------------------------------------------------------------------|-----|
| Table of Content.....                                                                                                                                                                        | S1  |
| (1) Figures S1-S8: Absorption spectra of <b>2</b> and <b>3</b> in CH <sub>3</sub> CN in the presence of individual metal ion .....                                                           | S2  |
| (2) Figure S9: Fluorescence spectra of <b>2</b> in CH <sub>3</sub> CN in the presence of Cu <sup>2+</sup> .....                                                                              | S6  |
| (3) Figure S10: Fluorescence spectra of <b>3</b> in CH <sub>3</sub> CN in the presence of Cu <sup>2+</sup> .....                                                                             | S6  |
| (4) Table S1: Absorption and fluorescence spectral parameters of <b>13</b> .....                                                                                                             | S7  |
| (5) Figure S11: Fluorescence excitation and emission spectra of the oxidation product <b>13a</b> and <b>3a</b> in the presence of 1.0 equivalent Cu <sup>2+</sup> in CH <sub>3</sub> CN..... | S7  |
| (6) Figure S12: Absorption and fluorescence spectra of <b>13a</b> in CH <sub>3</sub> CN in the presence of Cu <sup>2+</sup> .....                                                            | S8  |
| (7) Figure S13: Time scan of the fluorescence of <b>3a</b> in the presence of Cu <sup>2+</sup> in CH <sub>3</sub> CN.....                                                                    | S8  |
| (8) Figure S14: Fluorescence spectra of <b>3a</b> in CH <sub>3</sub> CN in the presence of increasing concentration of Cu(ClO <sub>4</sub> ) <sub>2</sub> and linear response curve.....     | S9  |
| (9) Optimization of assay conditions in aqueous solutions                                                                                                                                    |     |
| Figure S15: pH profile of fluorescence intensity of <b>3a</b> in the presence of Cu <sup>2+</sup> .....                                                                                      | S9  |
| Figure S16: Ionic strength effect on fluorescence of <b>3a</b> in the presence of Cu <sup>2+</sup> .....                                                                                     | S10 |
| Figure S17: Reaction duration on resultant fluorescence of <b>3a</b> in the presence of Cu <sup>2+</sup> .....                                                                               | S10 |
| (10) Figure S18: Fluorescent response of <b>3a</b> toward Cu <sup>2+</sup> with varied counter anion.....                                                                                    | S11 |
| (11) <sup>1</sup> H NMR and <sup>13</sup> C NMR spectra of <b>2-13</b> .....                                                                                                                 | S12 |

1. Figures S1-S8

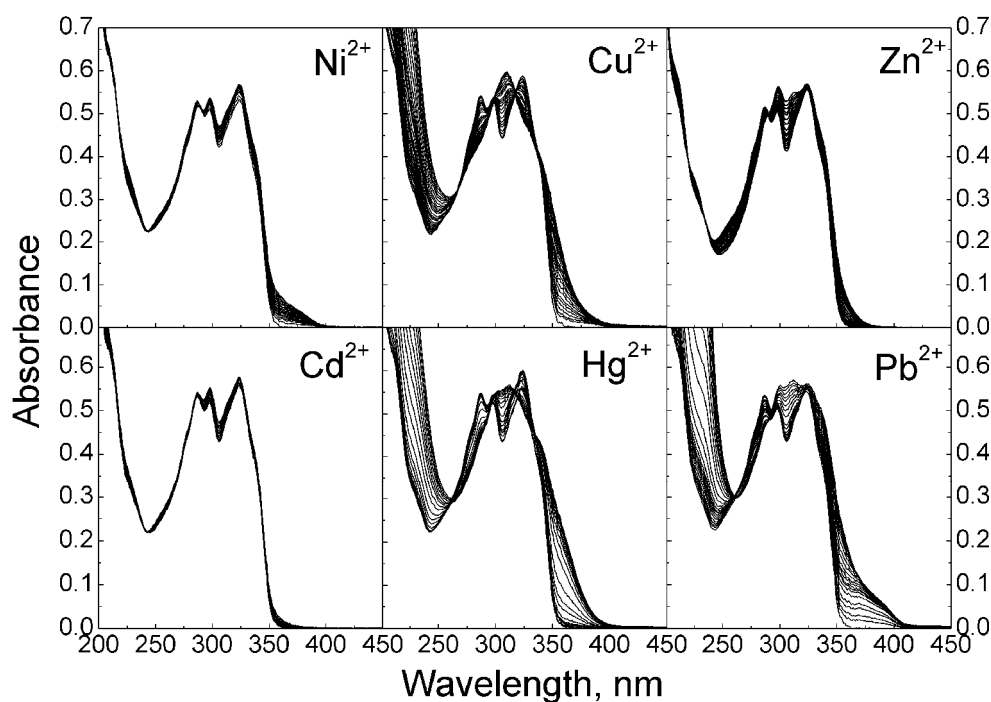

**Figure S1.** Absorption spectra of **2a** (20  $\mu\text{M}$ ) in  $\text{CH}_3\text{CN}$  in the presence of given metal ion of increasing concentration. Concentrations of metal ions increased in the same manner from 0 to 250  $\mu\text{M}$ .

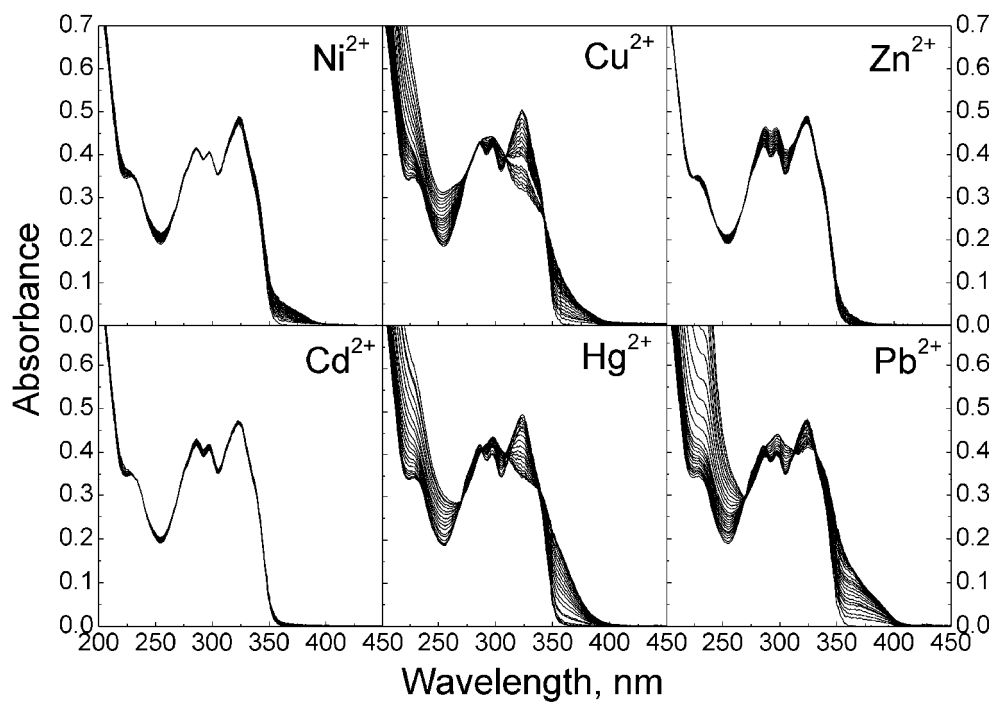

**Figure S2.** Absorption spectra of **2b** (20  $\mu\text{M}$ ) in  $\text{CH}_3\text{CN}$  in the presence of given metal ion of increasing concentration. Concentrations of metal ions increased in the same manner from 0 to 250  $\mu\text{M}$ .

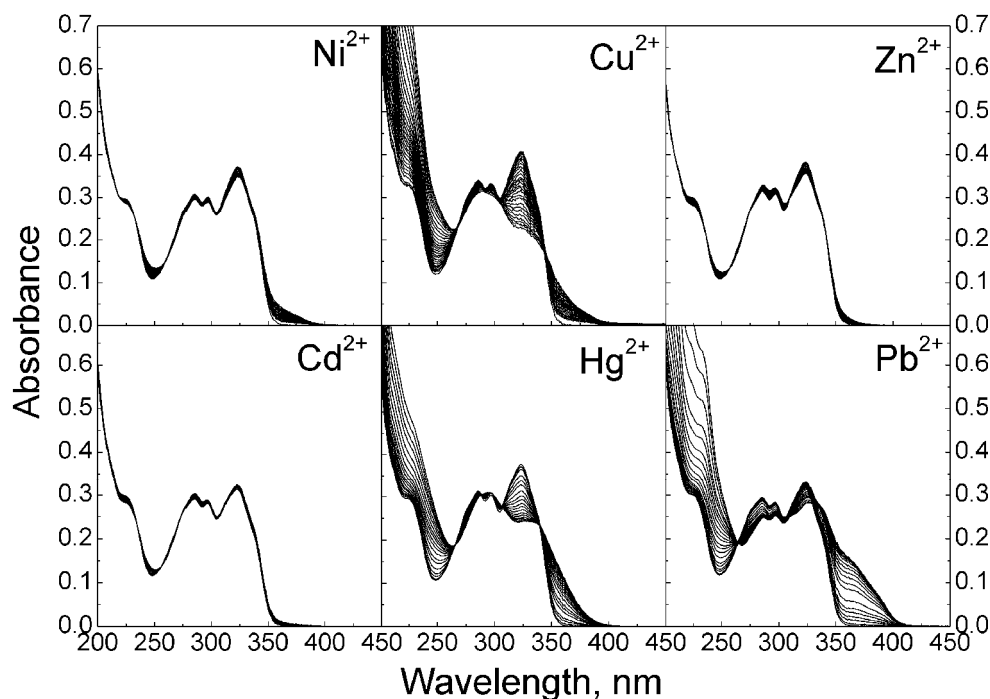

**Figure S3.** Absorption spectra of **2c** (20 μM) in CH<sub>3</sub>CN in the presence of given metal ion of increasing concentration. Concentrations of metal ions increased in the same manner from 0 to 250 μM.

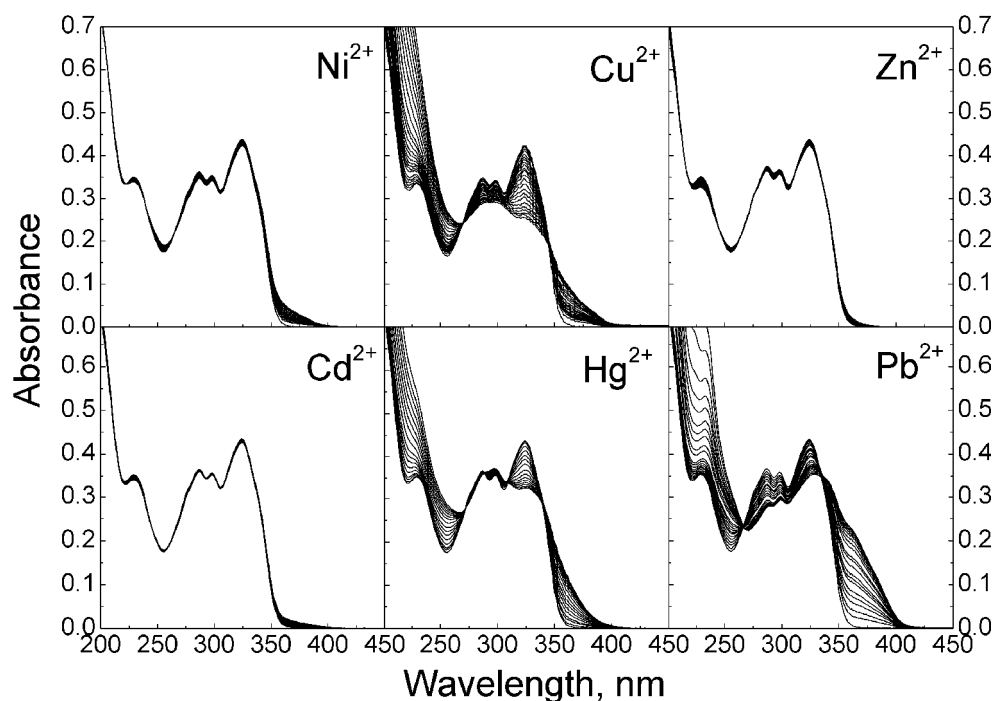

**Figure S4.** Absorption spectra of **2d** (20 μM) in CH<sub>3</sub>CN in the presence of given metal ion of increasing concentration. Concentrations of metal ions increased in the same manner from 0 to 250 μM.

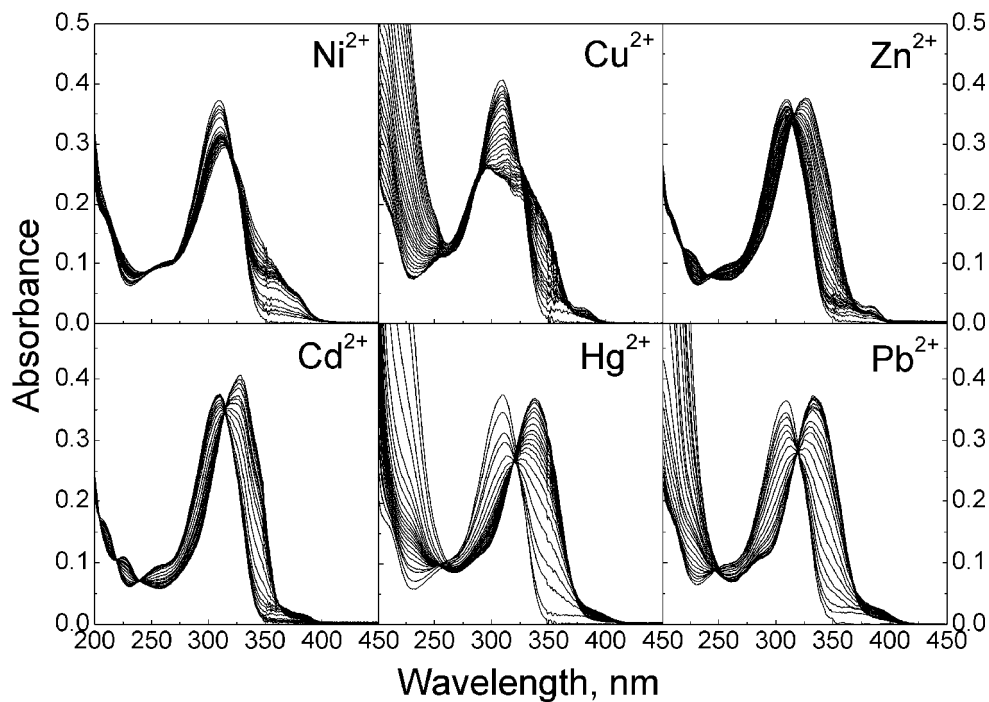

**Figure S5.** Absorption spectra of **3a** (10  $\mu\text{M}$ ) in  $\text{CH}_3\text{CN}$  in the presence of given metal ion of increasing concentration. Concentrations of metal ions increased in the same manner from 0 to 250  $\mu\text{M}$ .

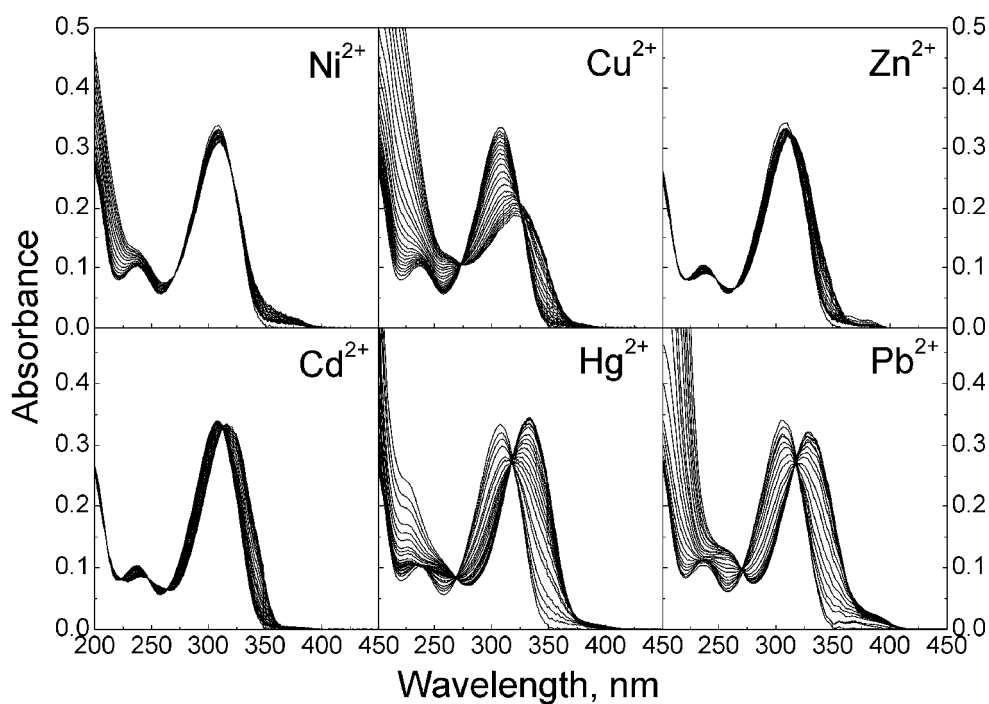

**Figure S6.** Absorption spectra of **3b** (10  $\mu\text{M}$ ) in  $\text{CH}_3\text{CN}$  in the presence of given metal ion of increasing concentration. Concentrations of metal ions increased in the same manner from 0 to 250  $\mu\text{M}$ .

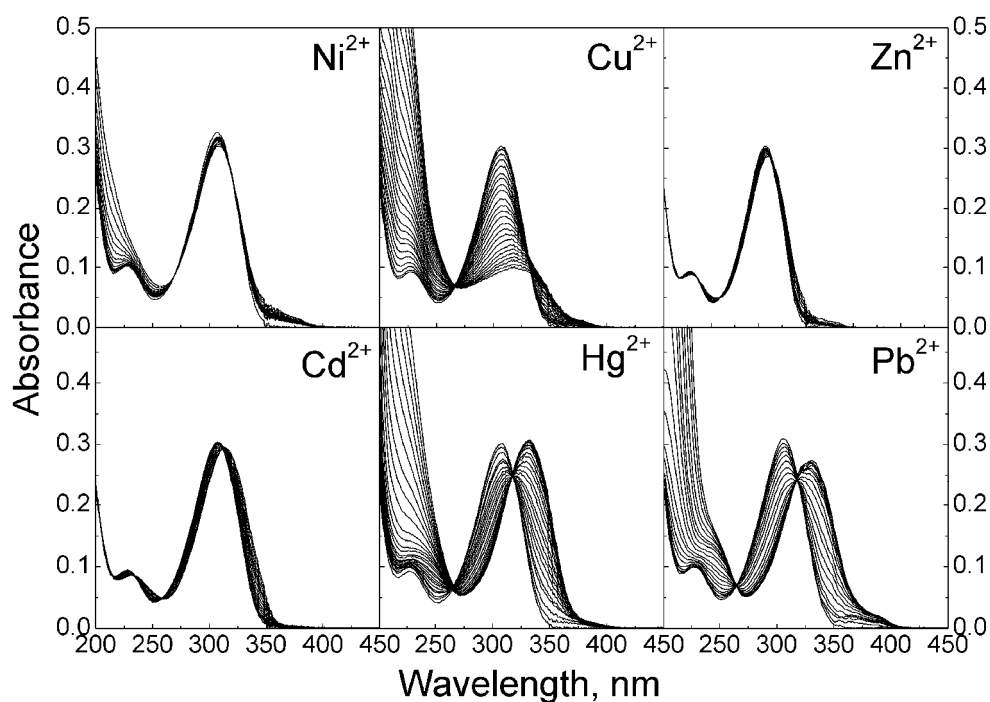

**Figure S7.** Absorption spectra of **3c** (10  $\mu\text{M}$ ) in  $\text{CH}_3\text{CN}$  in the presence of given metal ion of increasing concentration. Concentrations of metal ions increased in the same manner from 0 to 250  $\mu\text{M}$ .

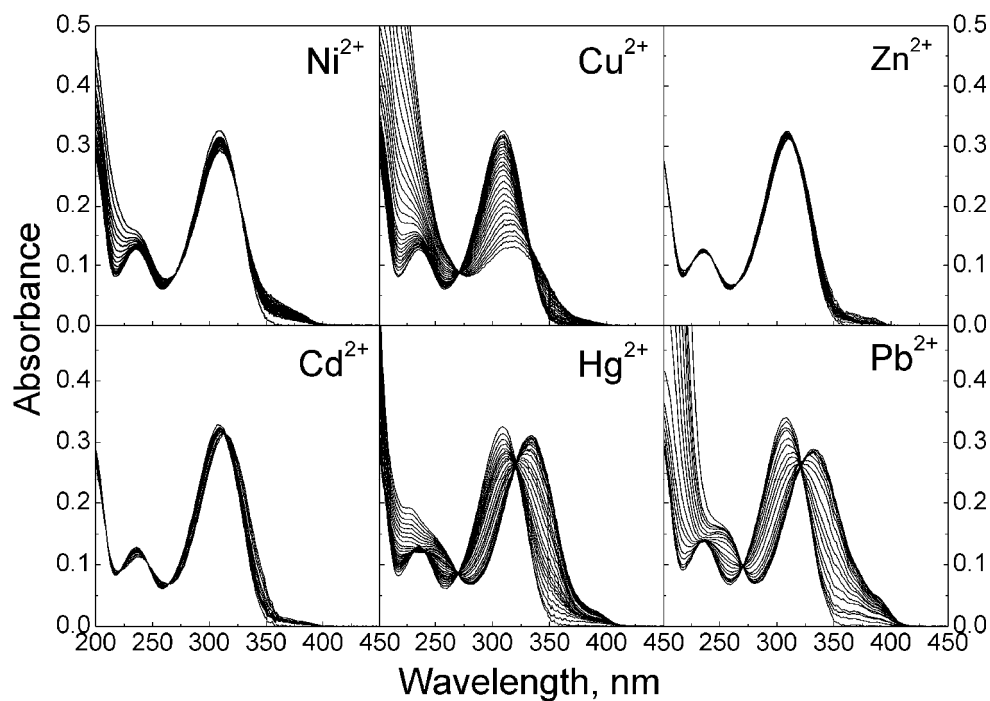

**Figure S8.** Absorption spectra of **3d** (10  $\mu\text{M}$ ) in  $\text{CH}_3\text{CN}$  in the presence of given metal ion of increasing concentration. Concentrations of metal ions increased in the same manner from 0 to 250  $\mu\text{M}$ .

2. Figure S9

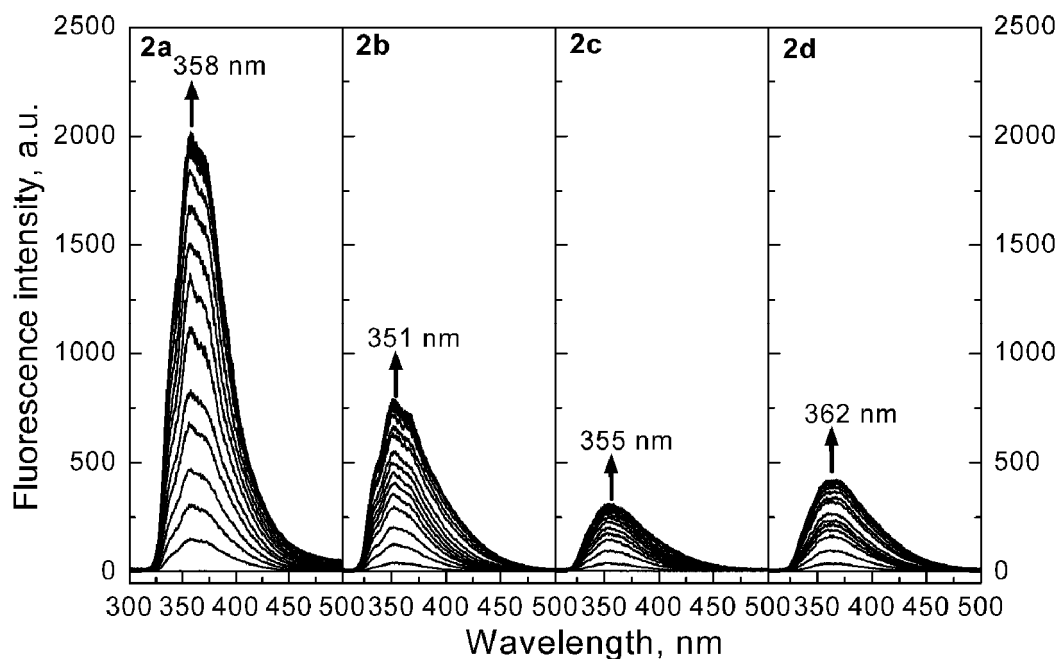

**Figure S9.** Fluorescence spectra of **2** in CH<sub>3</sub>CN in the presence of increasing concentration of Cu(ClO<sub>4</sub>)<sub>2</sub>. [**2**] = 10  $\mu$ M.

3. Figure S10

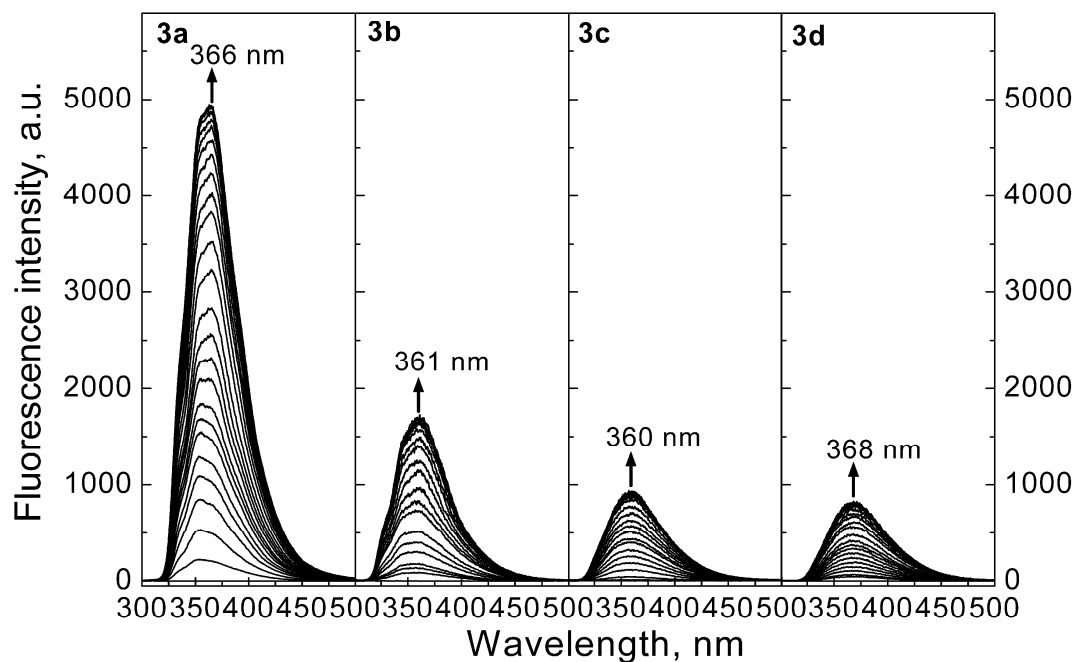

**Figure S10.** Fluorescence spectra of **3** in CH<sub>3</sub>CN in the presence of increasing concentration of Cu(ClO<sub>4</sub>)<sub>2</sub>. [**3**] = 10  $\mu$ M.

#### 4. Table S1

**Table S1.** Absorption and fluorescence spectral parameters of **13**

|            | $\lambda_{\text{abs}}$ , nm | $\epsilon$ , $10^4 \text{ M}^{-1} \text{ cm}^{-1}$ | $\lambda_{\text{flu}}$ , nm | $\Phi^a$ |
|------------|-----------------------------|----------------------------------------------------|-----------------------------|----------|
| <b>13a</b> | 300                         | 4.37                                               | 353/366                     | 0.725    |
| <b>13b</b> | 294                         | 3.98                                               | 347/361                     | 0.719    |
| <b>13c</b> | 291                         | 3.81                                               | 360                         | 0.719    |
| <b>13d</b> | 295                         | 3.76                                               | 368                         | 0.720    |

<sup>a</sup> Fluorescence quantum yield of **13** was measured using quinine sulfate as a standard (0.546 in 0.5 M H<sub>2</sub>SO<sub>4</sub>; Demas, J. N.; Crobys, G. A. *J. Phys. Chem.* **1971**, 75, 991-1024). The measurement error was up to 5%.

#### 5. Figure S11

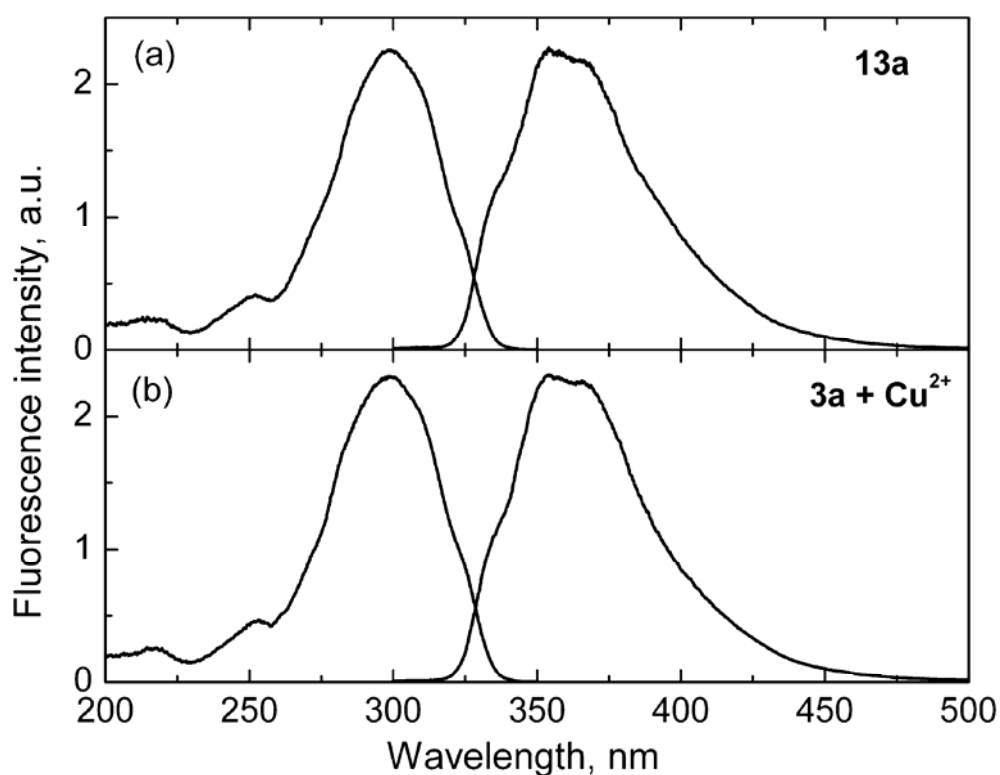

**Figure S11.** Fluorescence excitation and emission spectra of (a) the oxidation product **13a** and (b) **3a** in the presence of 1.0 equivalent Cu<sup>2+</sup> in CH<sub>3</sub>CN

## 6. Figure S12

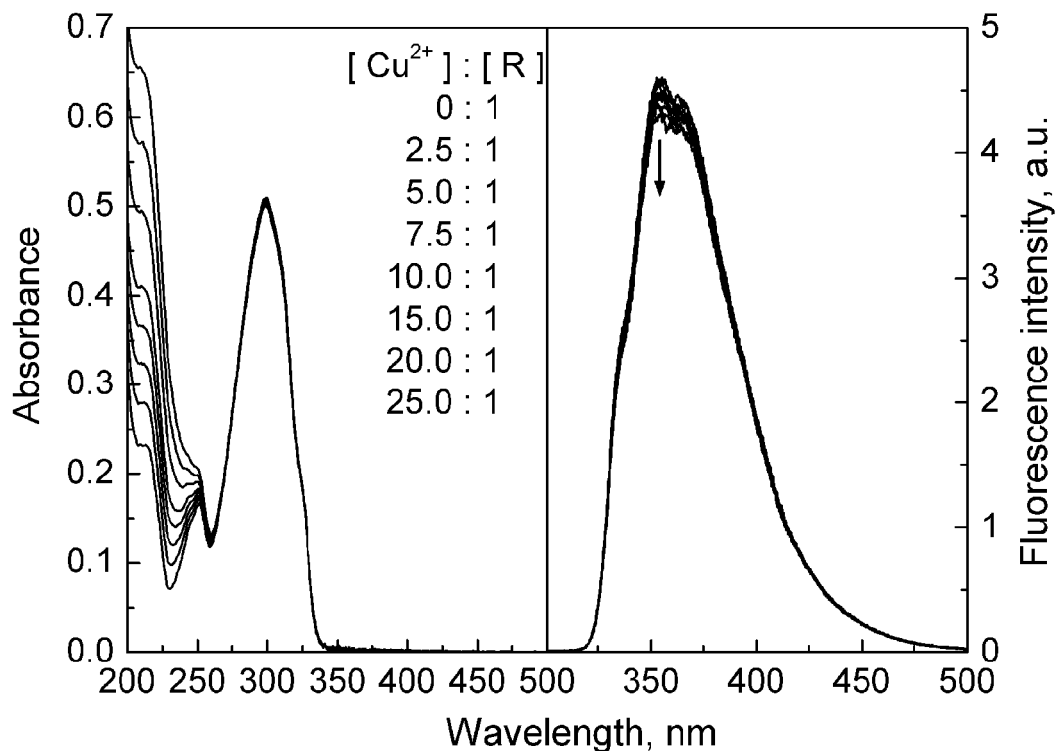

**Figure S12.** Absorption and fluorescence spectra of **13a** (10  $\mu$ M) in  $\text{CH}_3\text{CN}$  in the presence of increasing concentration of  $\text{Cu}^{2+}$ . The excitation wavelength for acquiring fluorescence spectra was 283 nm.

## 7. Figure S13

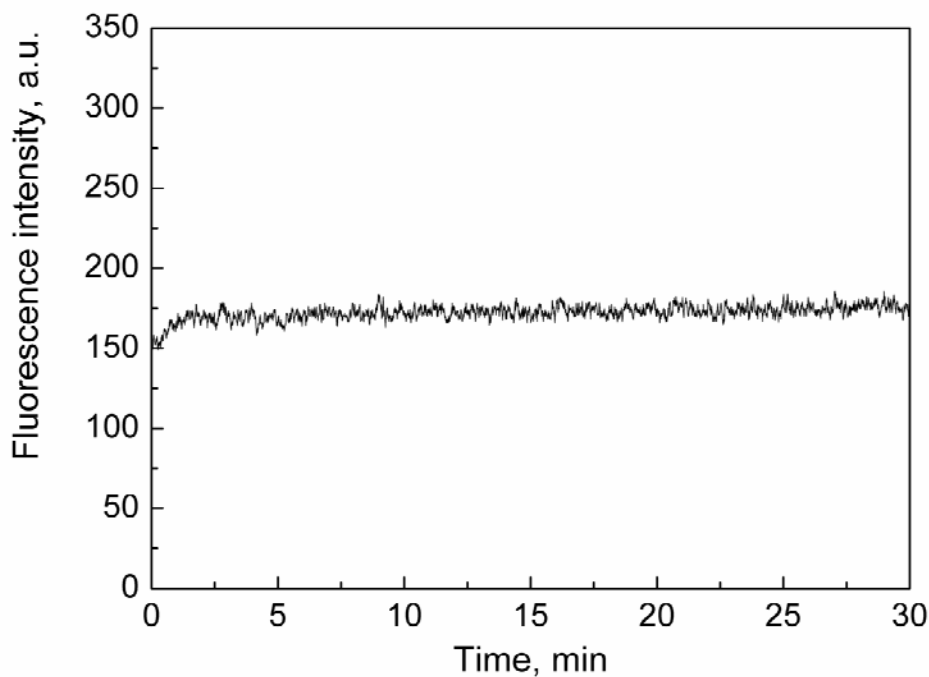

**Figure S13.** Time scan of fluorescence intensity of **3a** (0.5  $\mu$ M) in  $\text{CH}_3\text{CN}$  in the presence of 0.5 equiv. of  $\text{Cu}^{2+}$ . The excitation and emission wavelengths were 283 nm and 360 nm, respectively.



## 8. Figure S14

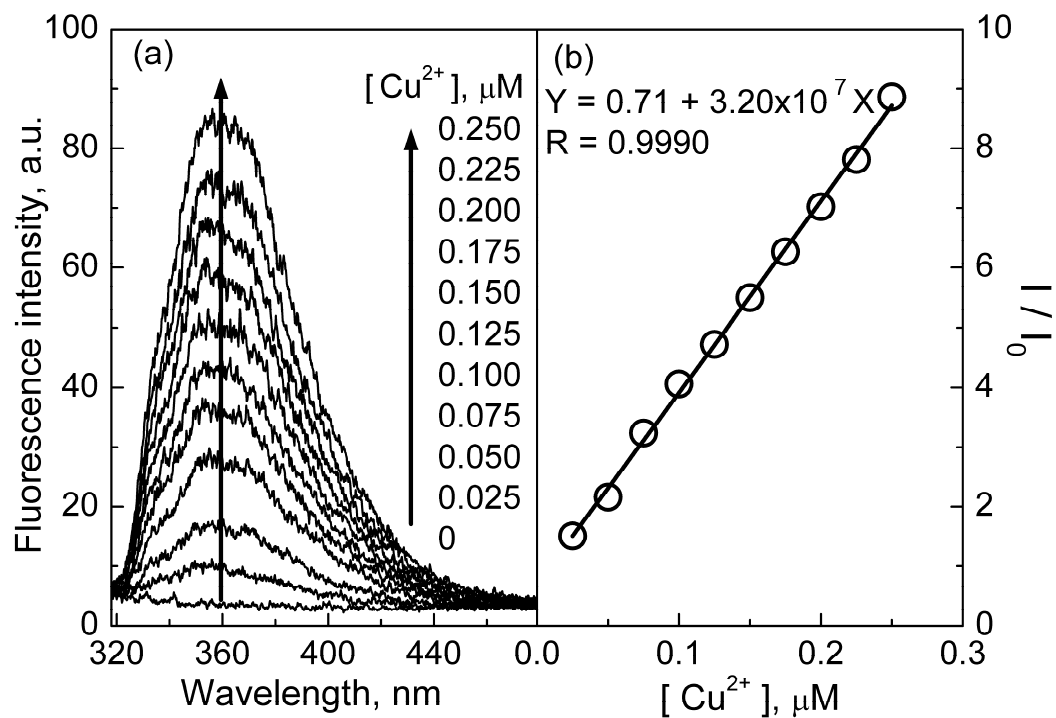

**Figure S14.** (a) Fluorescence spectra of **3a** (0.5 μM) in CH<sub>3</sub>CN in the presence of increasing concentration of Cu(ClO<sub>4</sub>)<sub>2</sub> and (b) linear response curve. Excitation wavelength was 283 nm.

## 9. Optimization of assay conditions in aqueous solution

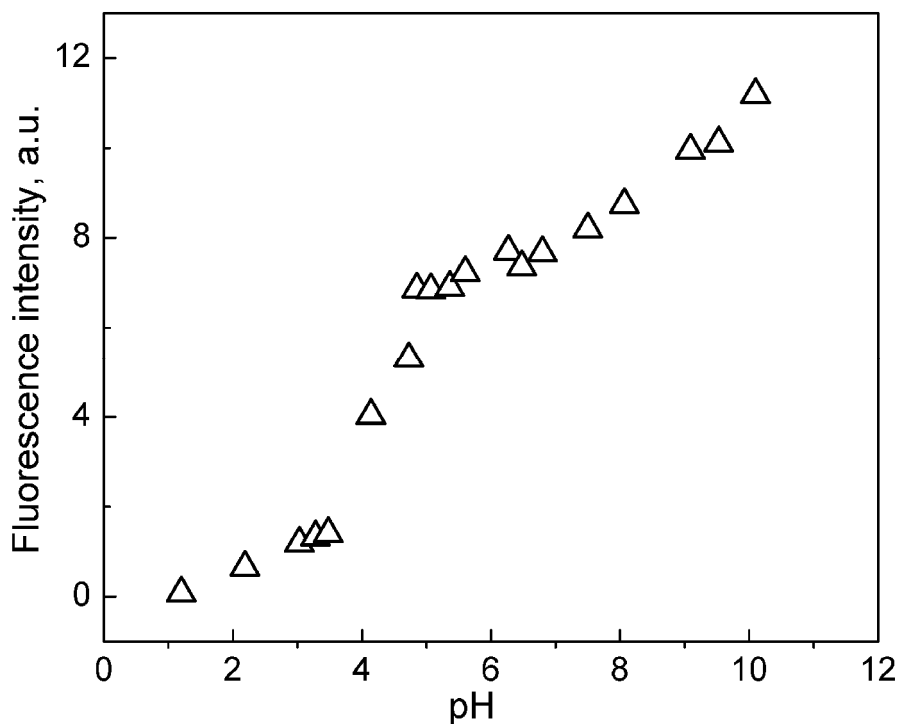

**Figure S15.** Plots of the fluorescence intensity of **3a** (10 μM) in the presence of 25 equiv. of Cu<sup>2+</sup> as a function of pH of CH<sub>3</sub>CN-H<sub>2</sub>O (1:1, v/v) solution

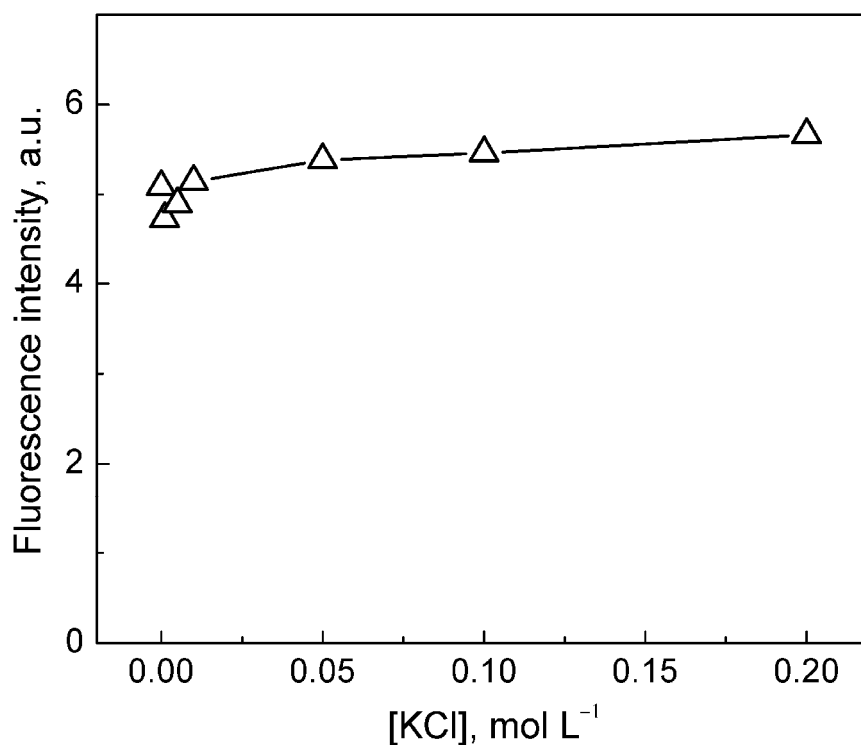

**Figure S16.** Ionic strength effect (KCl) of the fluorescence of **3a** in the presence of 25 equiv. of Cu<sup>2+</sup> in CH<sub>3</sub>CN-H<sub>2</sub>O (1:1, v/v). [KCl] = 0 - 0.2 M.

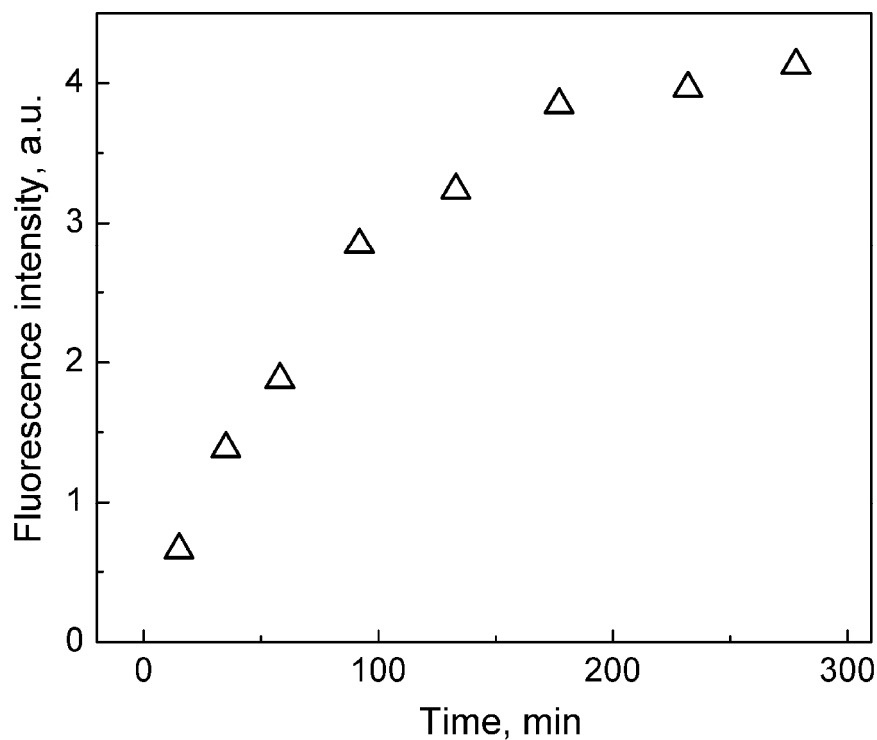

**Figure S17.** Influence of reaction duration on the fluorescence of **3a** in the presence of 25 equivalents of Cu<sup>2+</sup> in a mixture of CH<sub>3</sub>CN and Tris-HCl (5 mM, pH 7.2, KCl 0.1 M) aqueous buffer solution (20/80, v/v) at 50°C

10. Figure S18

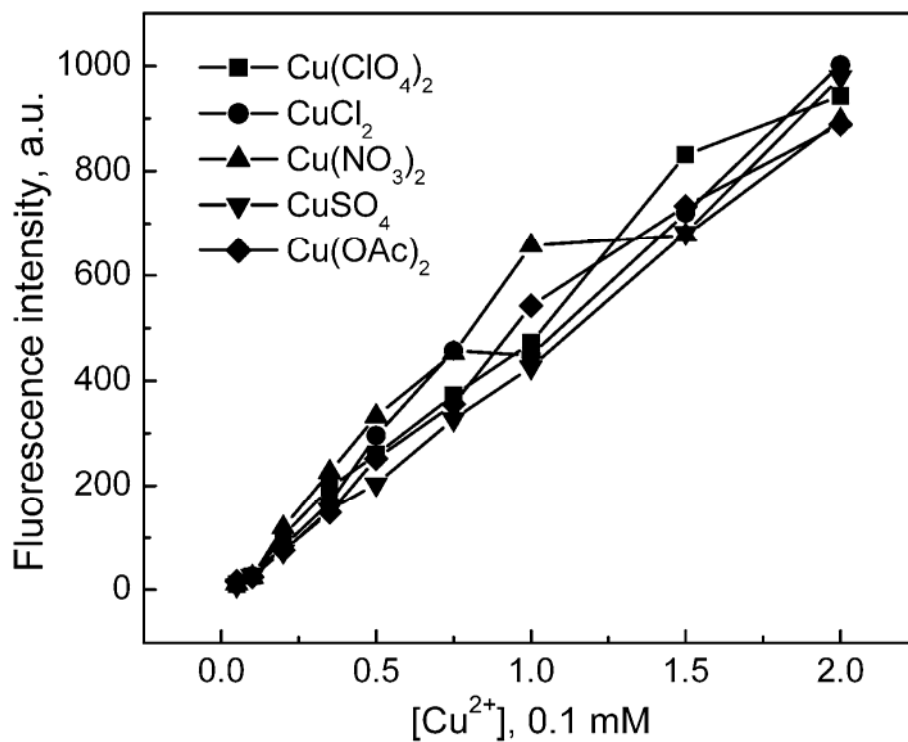

**Figure S18.** Fluorescent response of **3a** toward Cu<sup>2+</sup> with varied counter anion in a mixture of CH<sub>3</sub>CN and Tris-HCl (5 mM, pH 7.2, 0.1 M KCl) aqueous buffer solution (20/80, v/v)

# 11. $^1\text{H}$ NMR and $^{13}\text{C}$ NMR spectra of compounds 2-13

## *N'*-(2-Methoxybenzylidene)-4-ethoxybenzohydrazide (**2a**):

$^1\text{H}$  NMR (500MHz,  $\text{DMSO}-d_6$ )

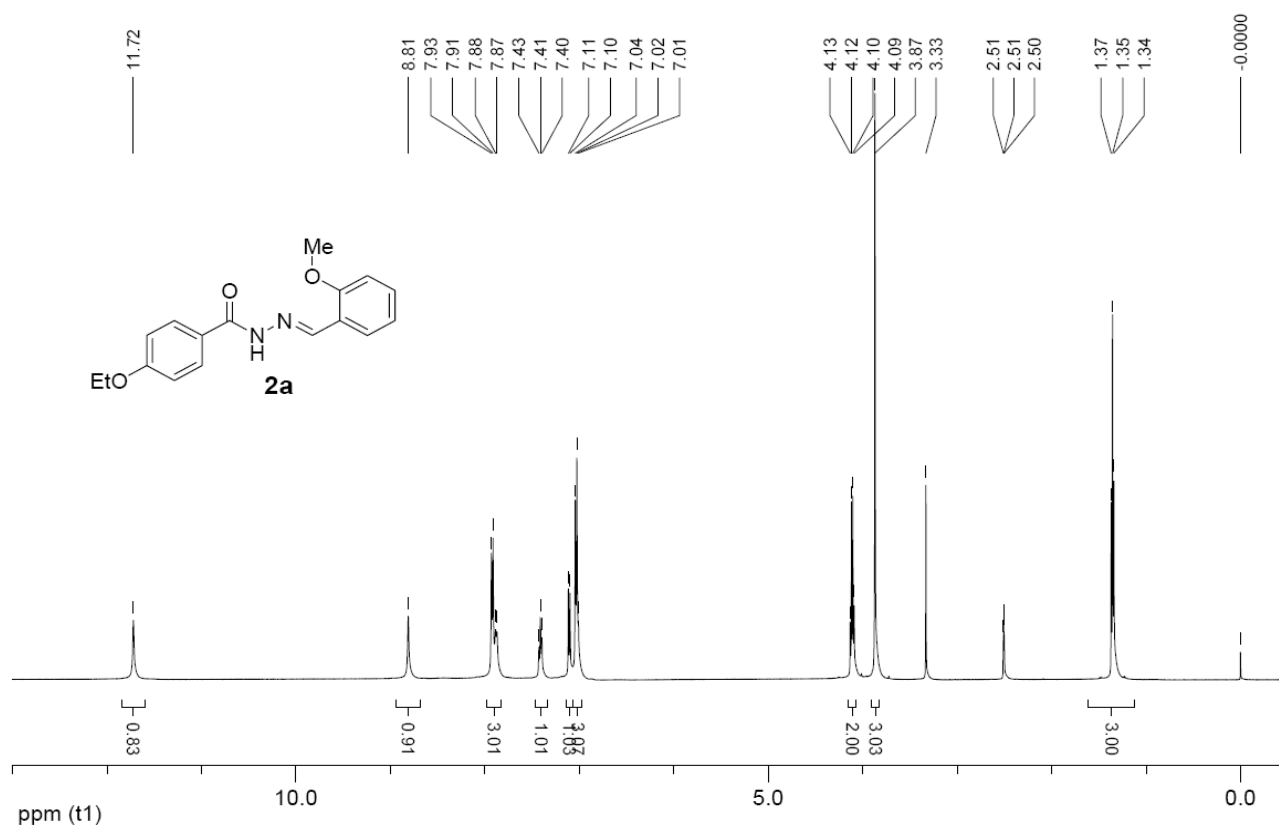

$^{13}\text{C}$  NMR (125MHz,  $\text{DMSO}-d_6$ )

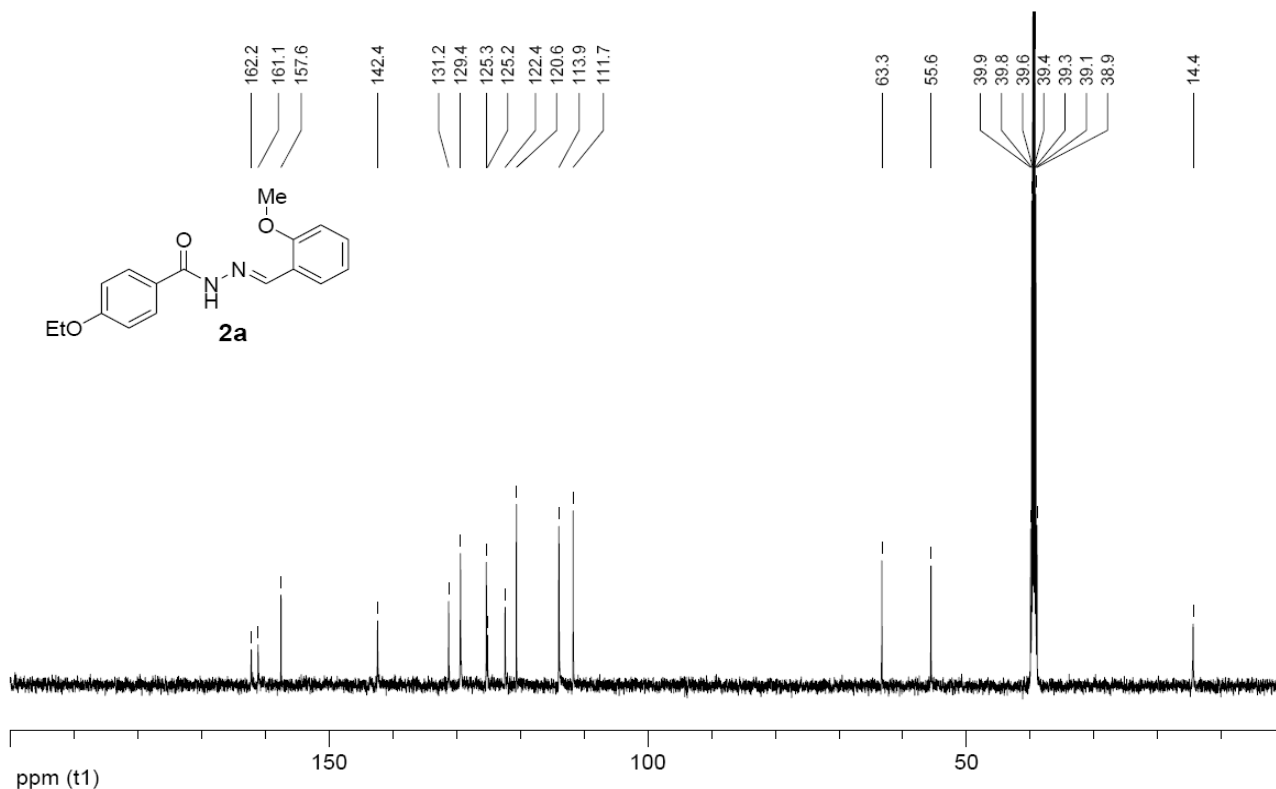

***N'*-(2-Methoxybenzylidene)-4-methylbenzohydrazide (2b):**

<sup>1</sup>H NMR (500MHz, DMSO-*d*<sub>6</sub>)

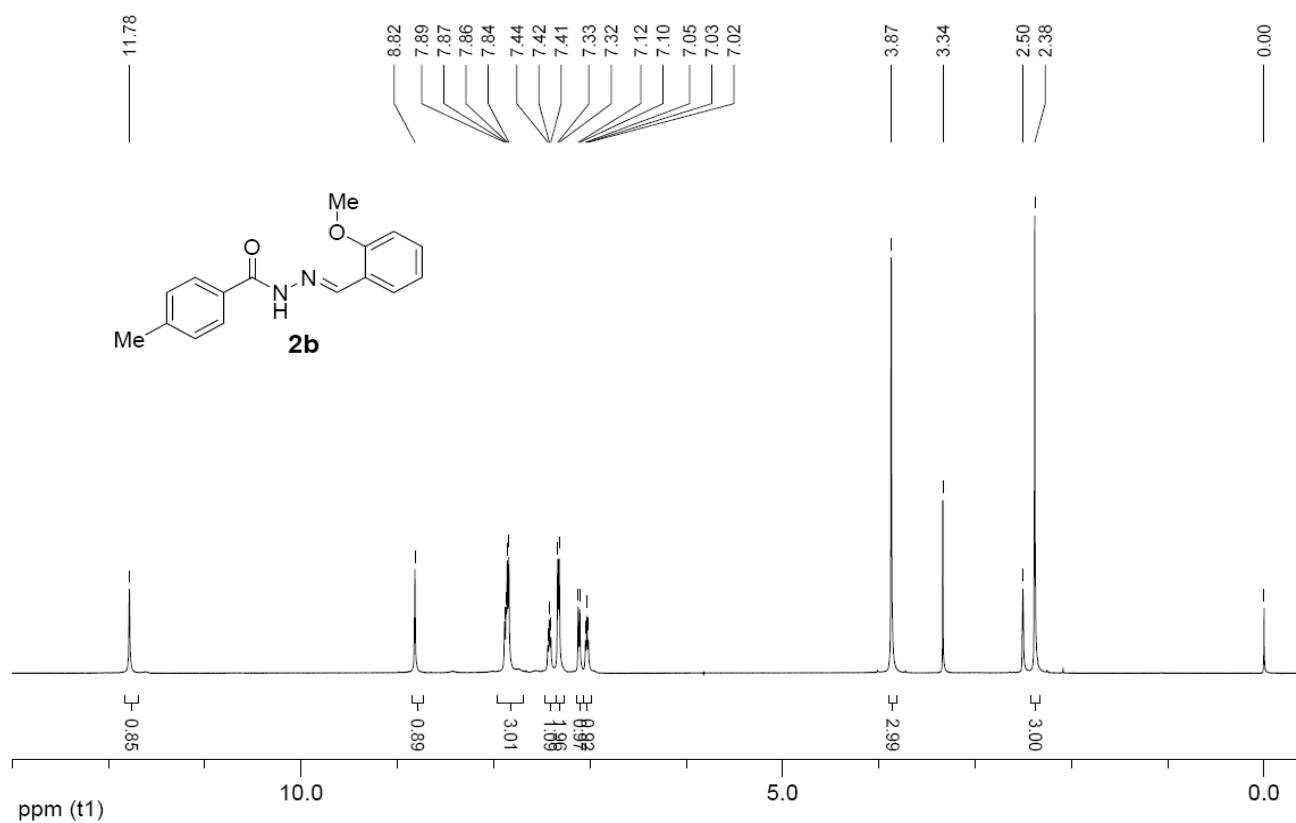

<sup>13</sup>C NMR (125MHz, DMSO-*d*<sub>6</sub>)

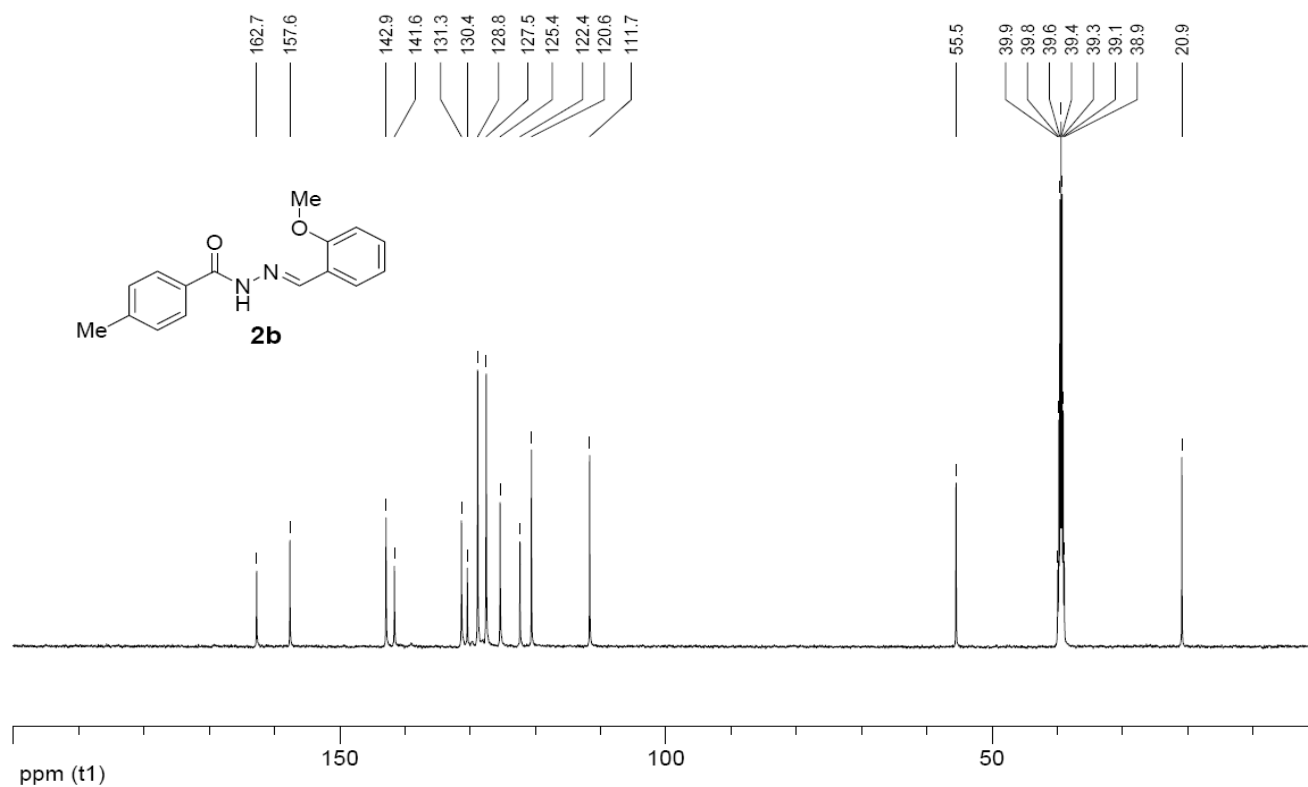

***N'*-(2-Methoxybenzylidene)benzohydrazide (2c):**

<sup>1</sup>H NMR (500MHz, DMSO-*d*<sub>6</sub>)

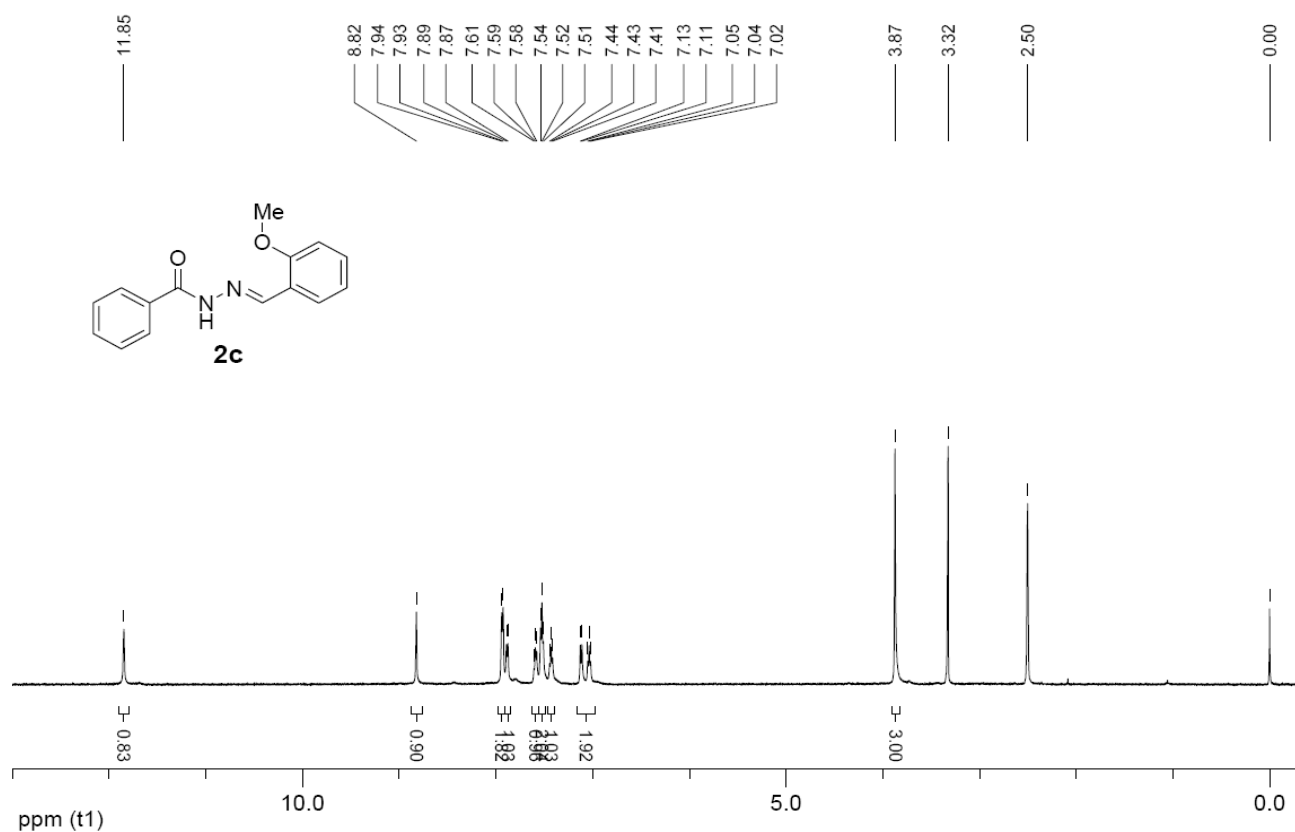

<sup>13</sup>C NMR (125MHz, DMSO-*d*<sub>6</sub>)

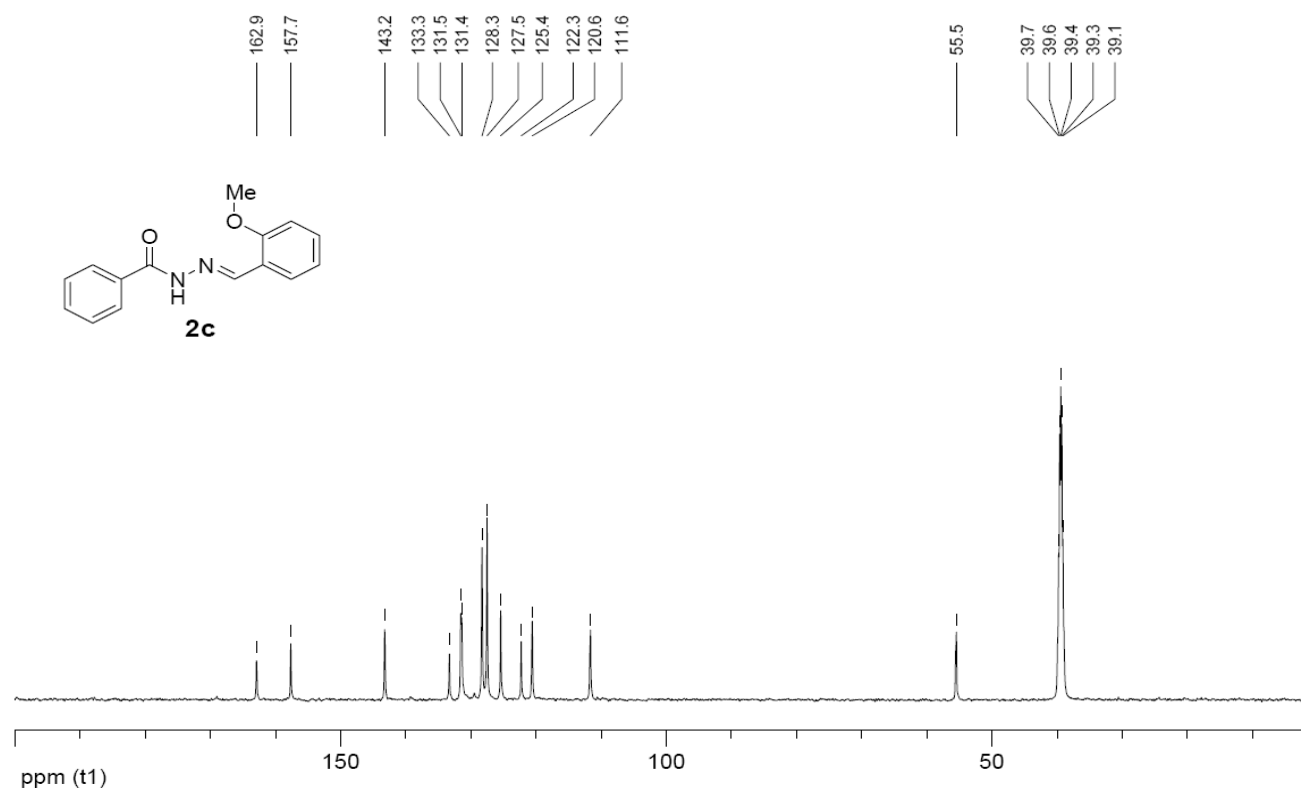

***N'*-(2-Methoxybenzylidene)-4-chlorobenzohydrazide (2d):**

<sup>1</sup>H NMR (500MHz, DMSO-*d*<sub>6</sub>)

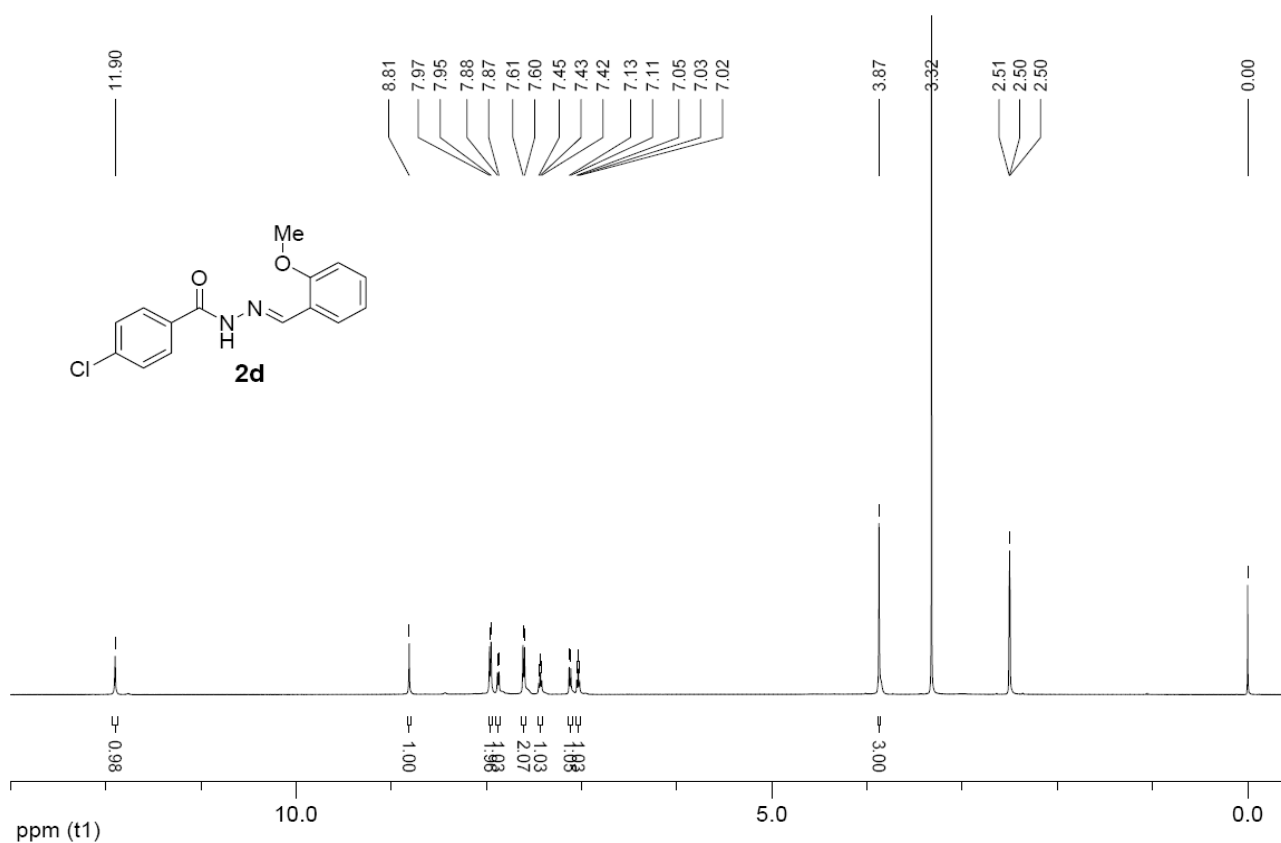

<sup>13</sup>C NMR (125MHz, DMSO-*d*<sub>6</sub>)

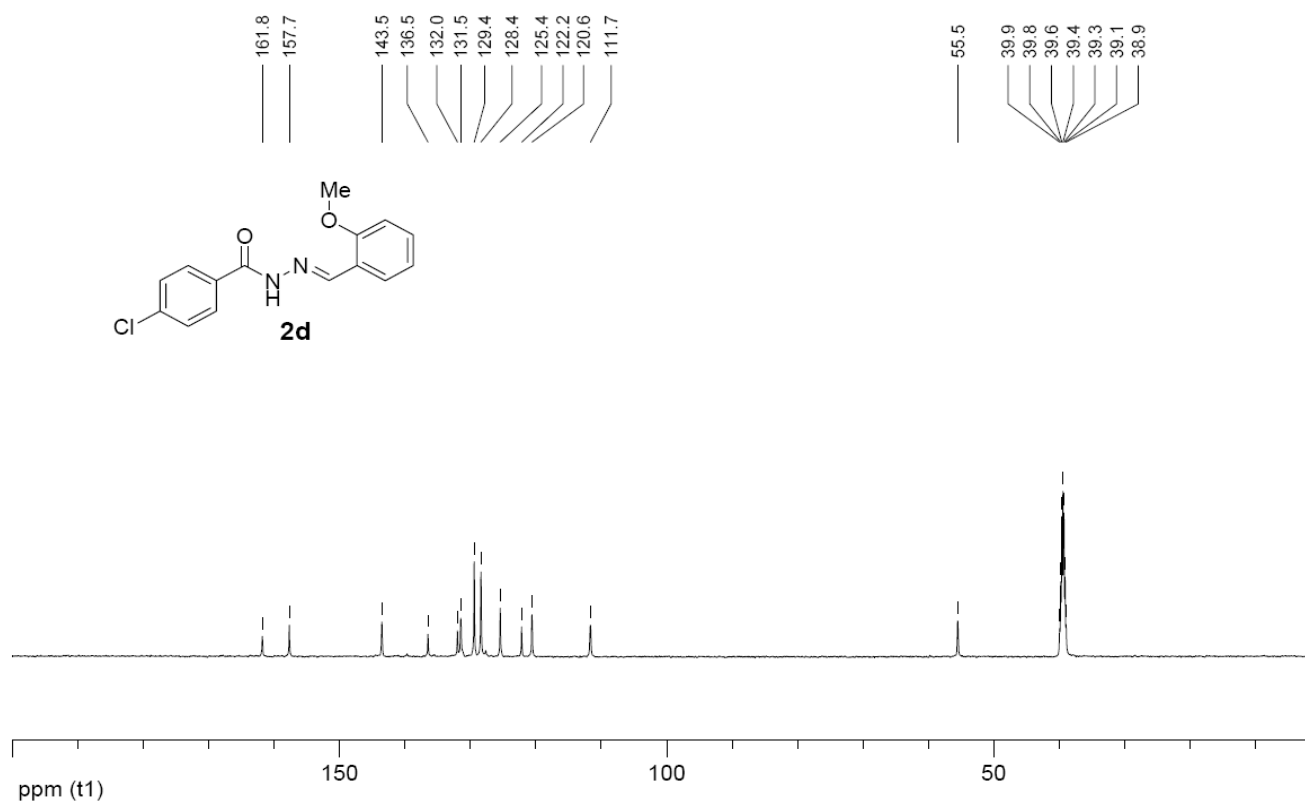

**4-Ethoxy-*N'*-(furan-2-ylmethylene)benzohydrazide (3a):**

<sup>1</sup>H NMR (400MHz, DMSO-*d*<sub>6</sub>)

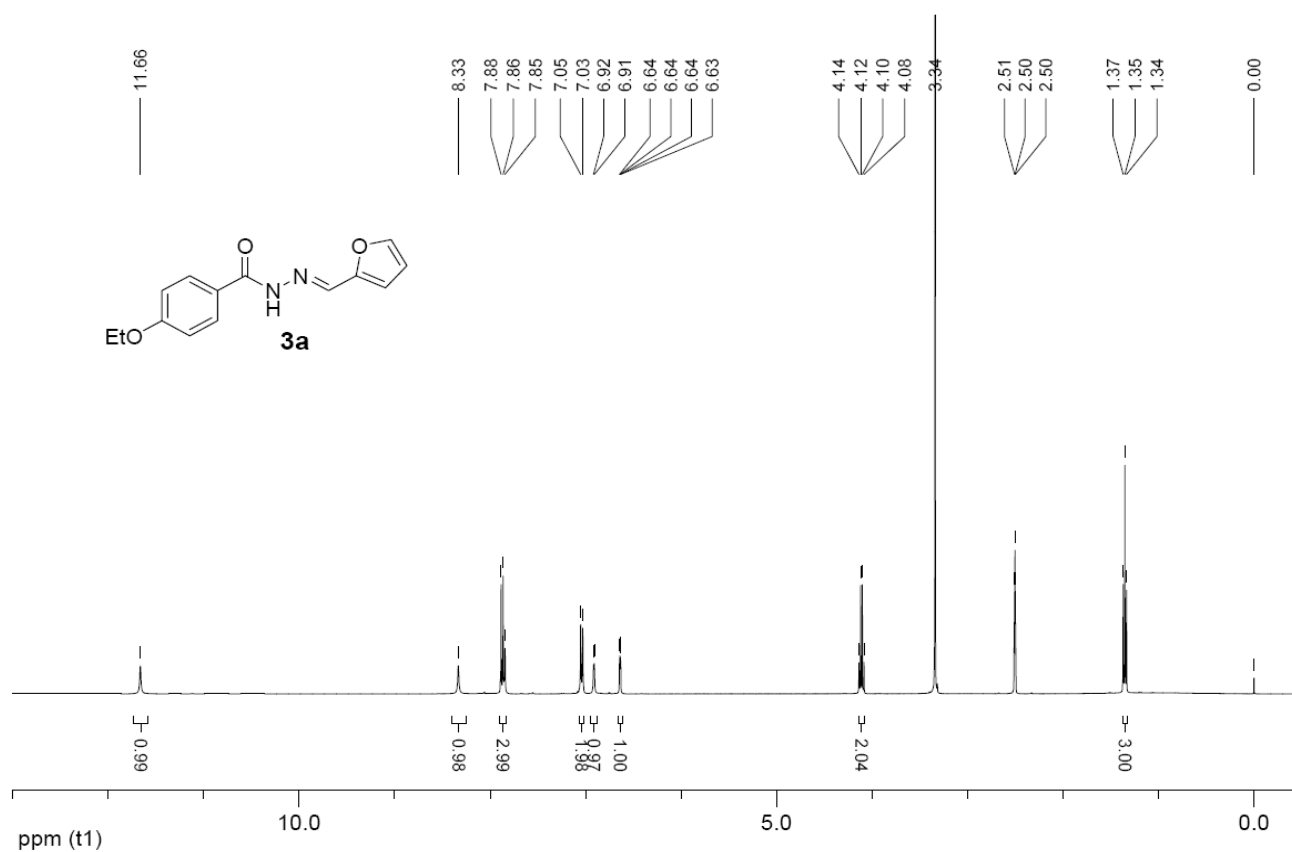

<sup>13</sup>C NMR (100MHz, DMSO-*d*<sub>6</sub>)

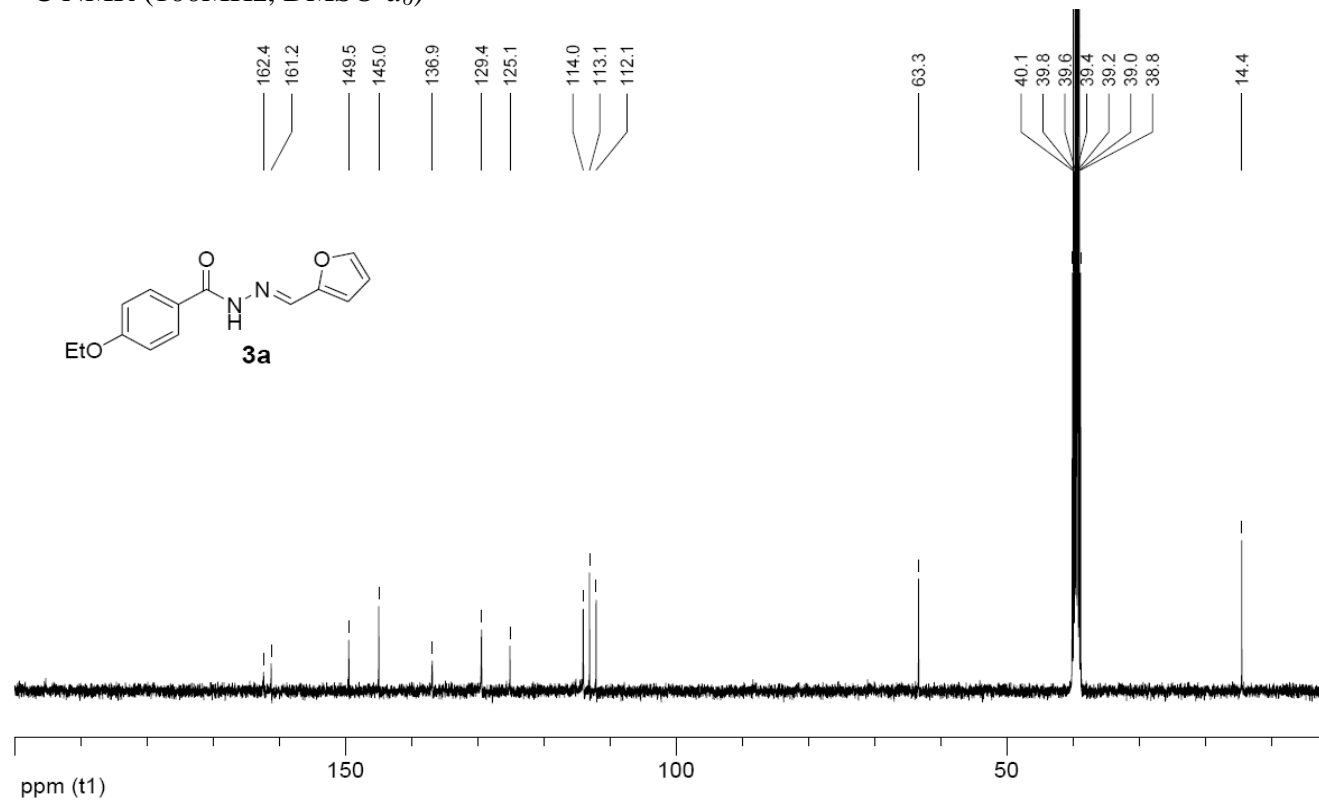



***N'*-(Furan-2-ylmethylene)-4-methylbenzohydrazide (3b):**

<sup>1</sup>H NMR (400MHz, DMSO-*d*<sub>6</sub>)

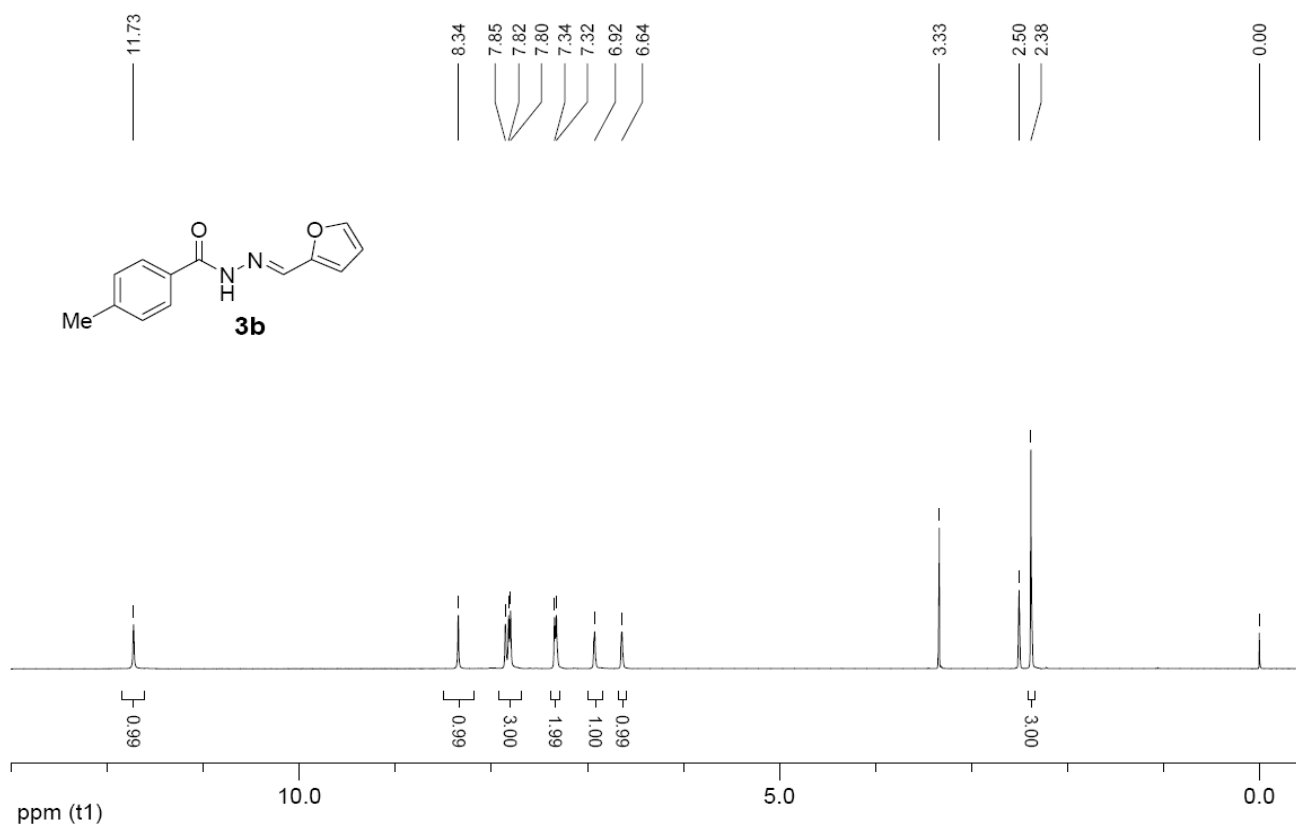

<sup>13</sup>C NMR (100MHz, DMSO-*d*<sub>6</sub>)

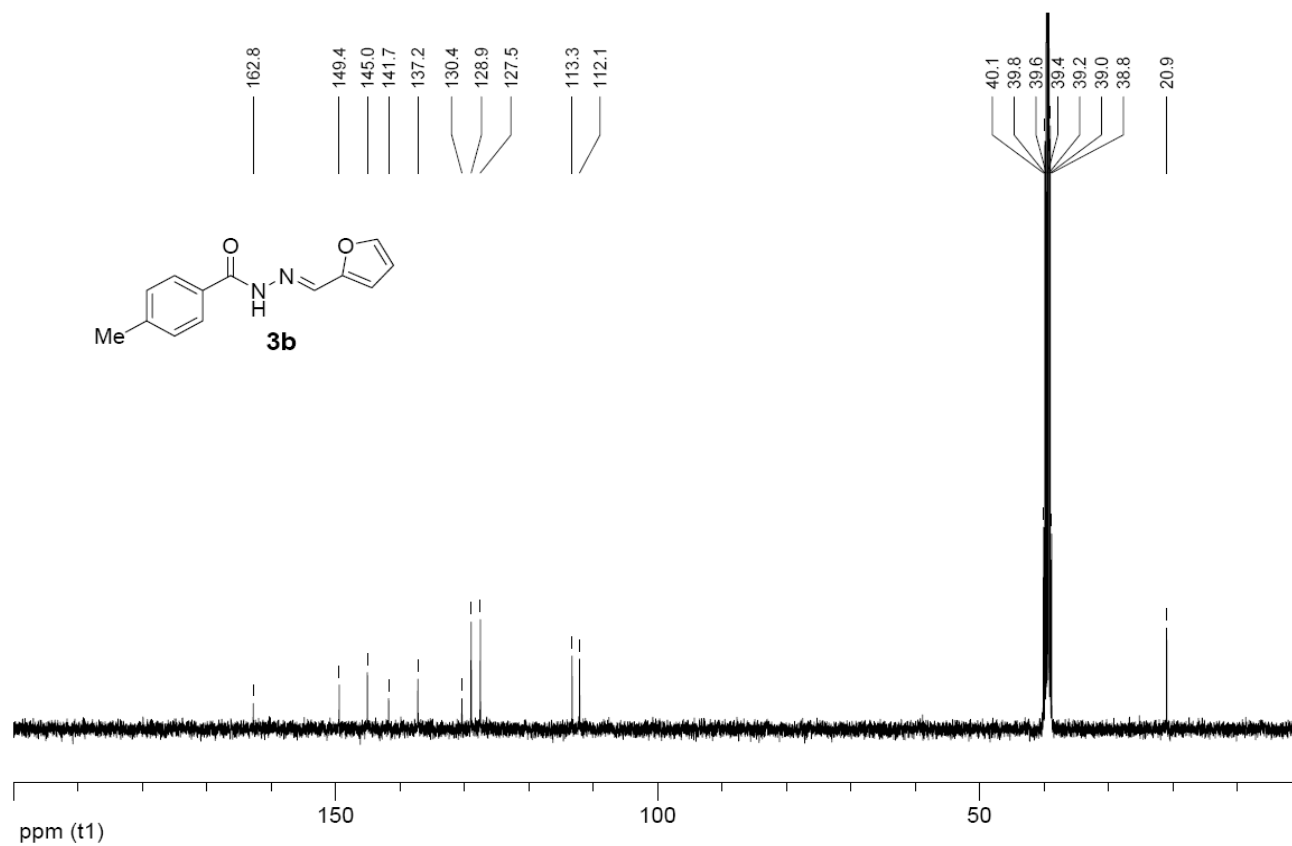

***N'*-(Furan-2-ylmethylene)benzohydrazide (3c):**

<sup>1</sup>H NMR (400MHz, DMSO-*d*<sub>6</sub>)

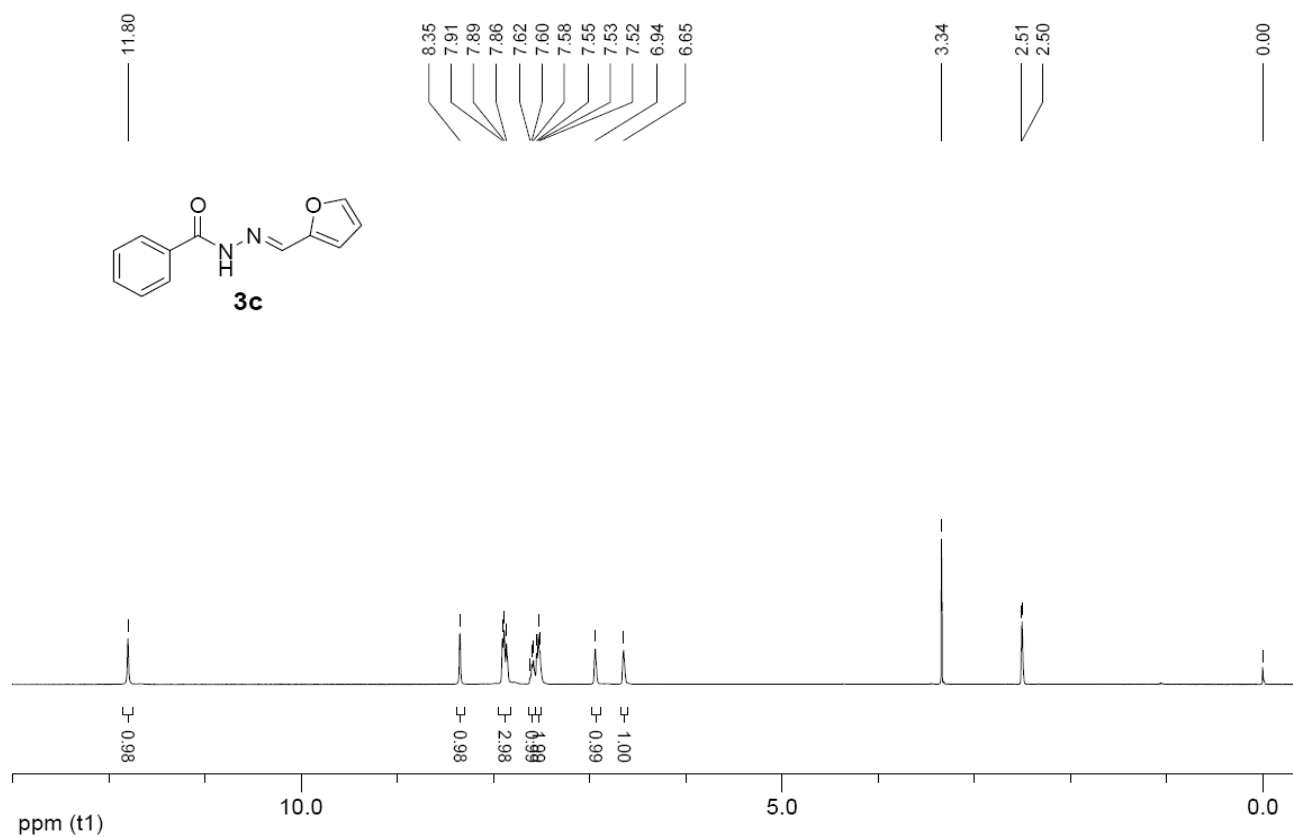

<sup>13</sup>C NMR (100MHz, DMSO-*d*<sub>6</sub>)

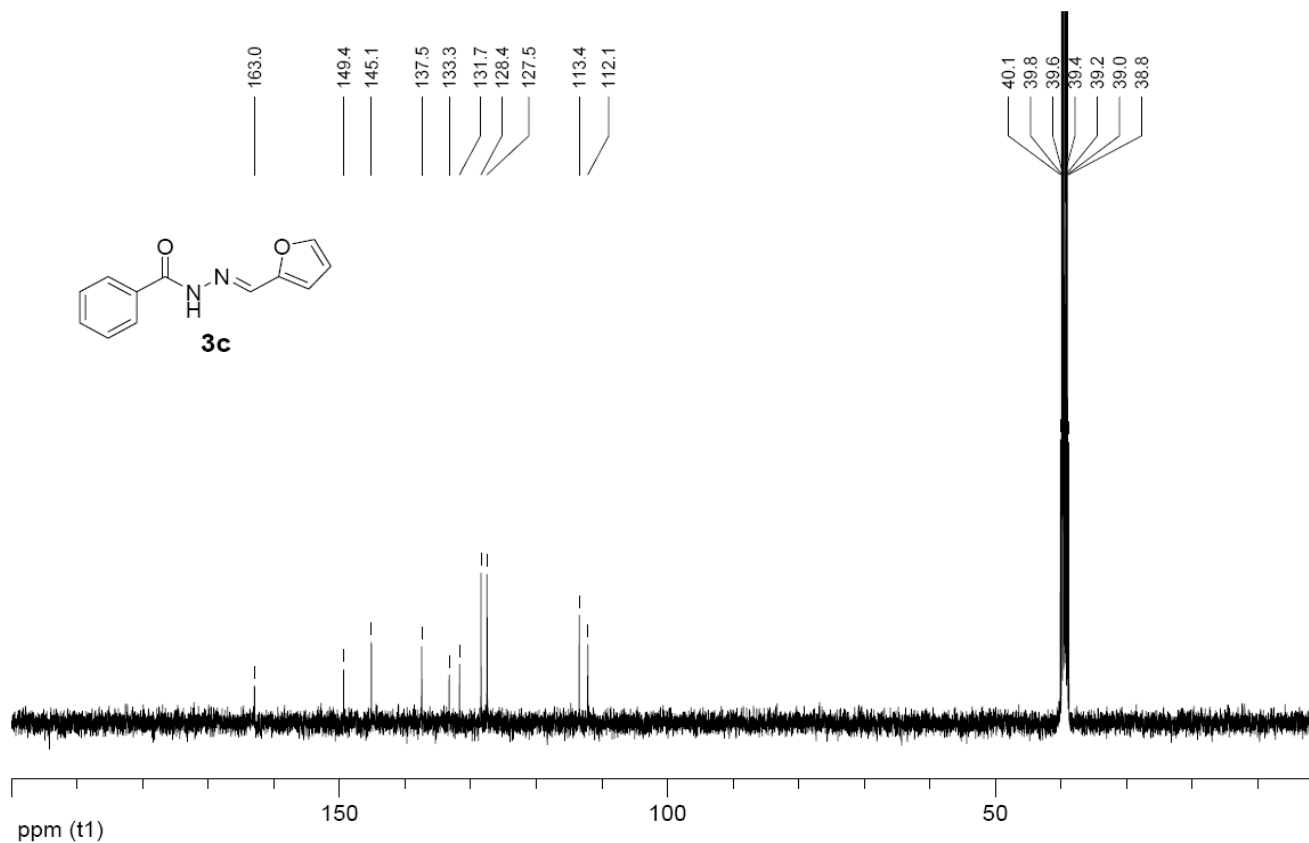

**4-Chloro-*N'*-(furan-2-ylmethylene)benzohydrazide (3d):**

<sup>1</sup>H NMR (400MHz, DMSO-*d*<sub>6</sub>)

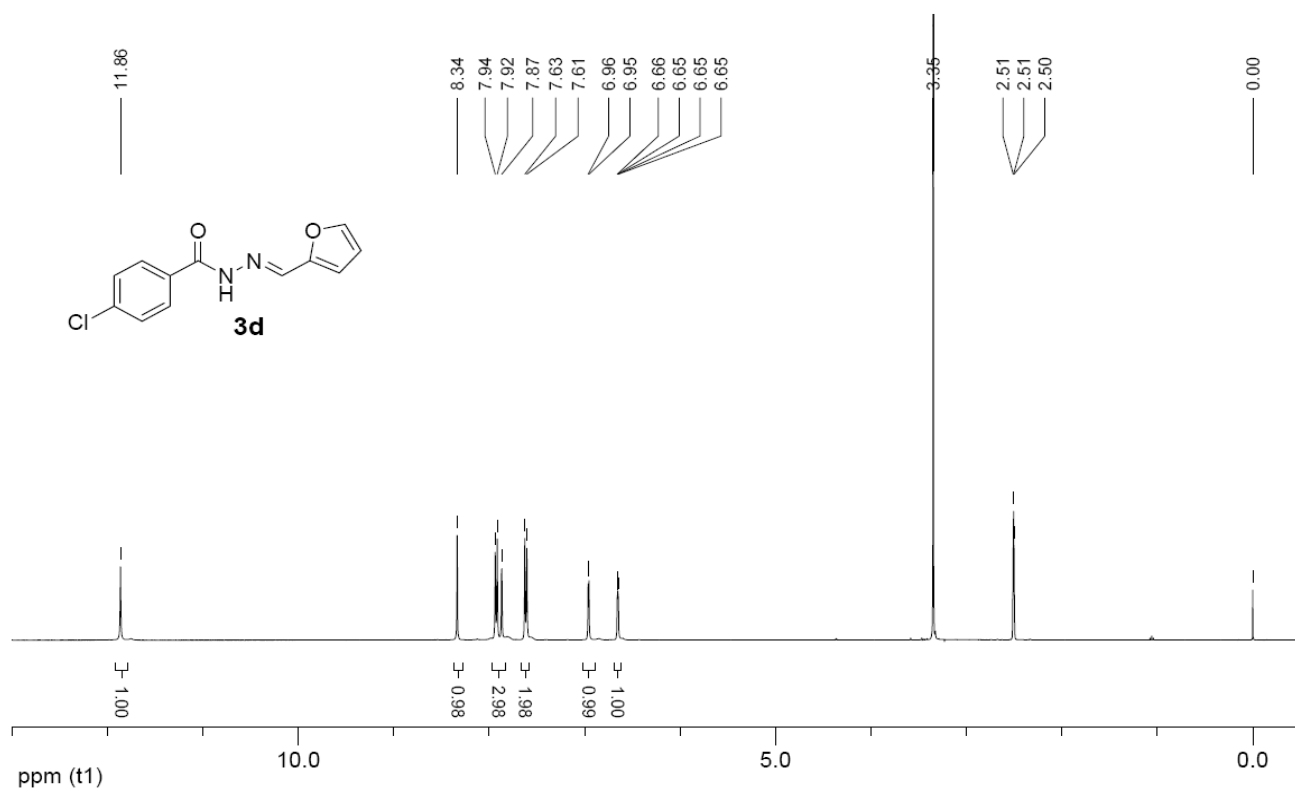

<sup>13</sup>C NMR (100MHz, DMSO-*d*<sub>6</sub>)

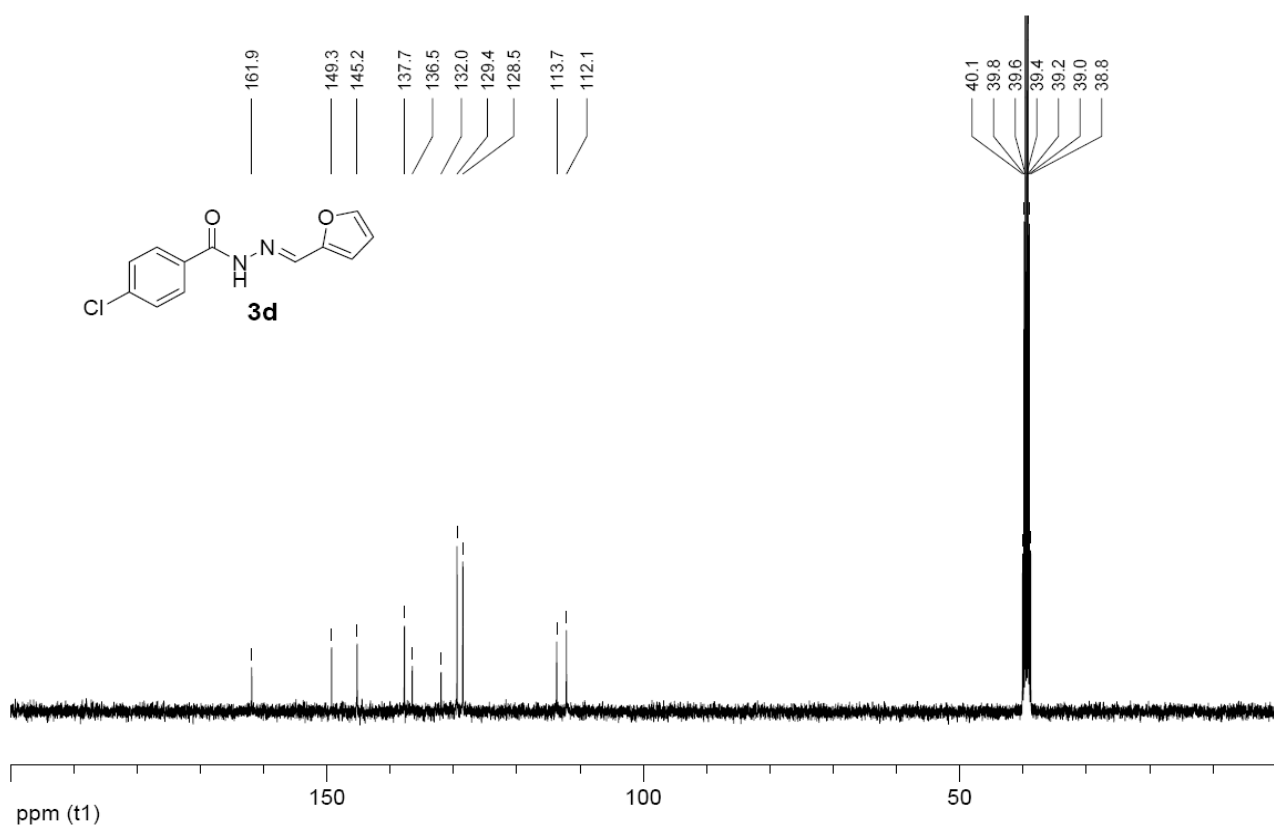

**4-Ethoxy-*N'*-(1-(furan-2-yl)ethylidene)benzohydrazide (4):**

<sup>1</sup>H NMR (400MHz, DMSO-*d*<sub>6</sub>)

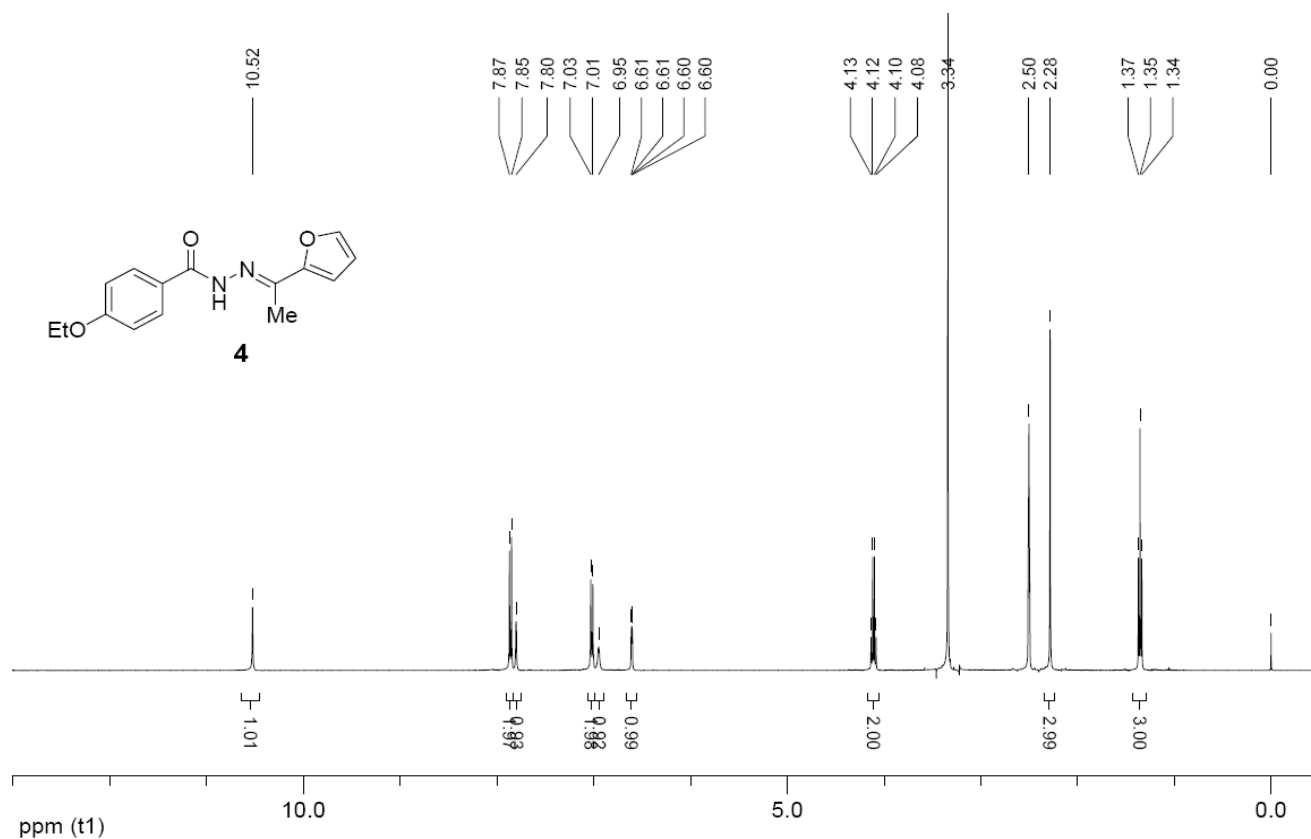

<sup>13</sup>C NMR (100MHz, DMSO-*d*<sub>6</sub>)

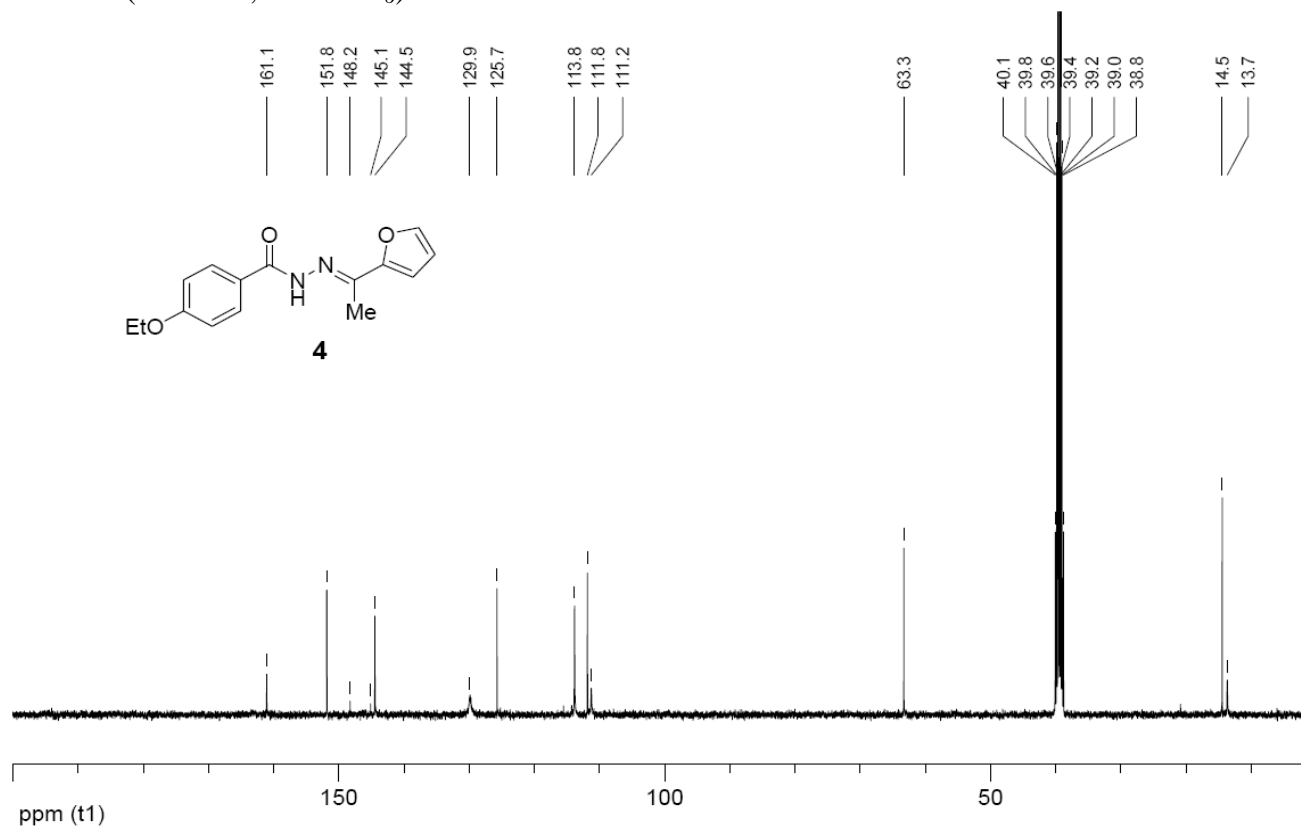

***N'*-(2-Ethoxybenzylidene)-4-ethoxybenzohydrazide (5):**

<sup>1</sup>H NMR (400MHz, DMSO-*d*<sub>6</sub>)

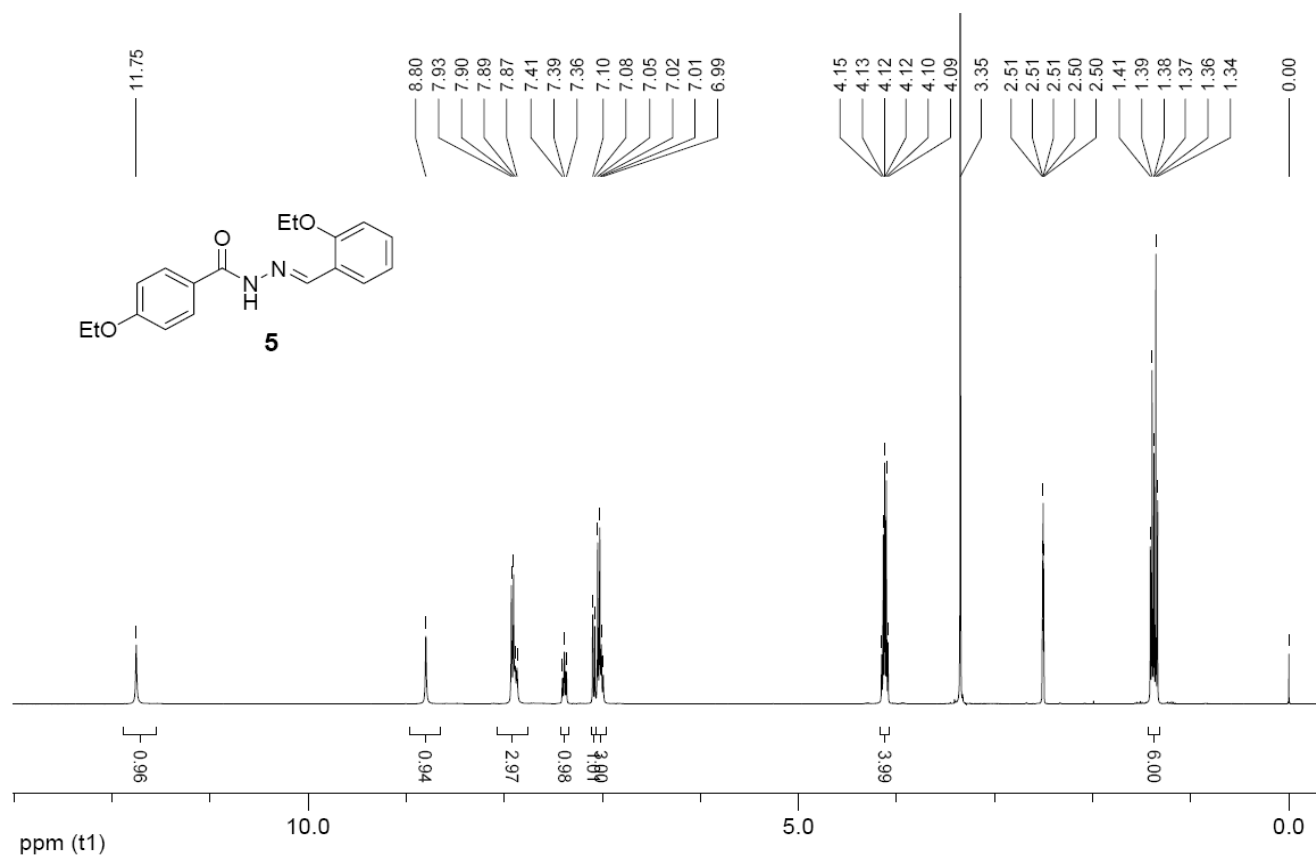

<sup>13</sup>C NMR (100MHz, DMSO-*d*<sub>6</sub>)

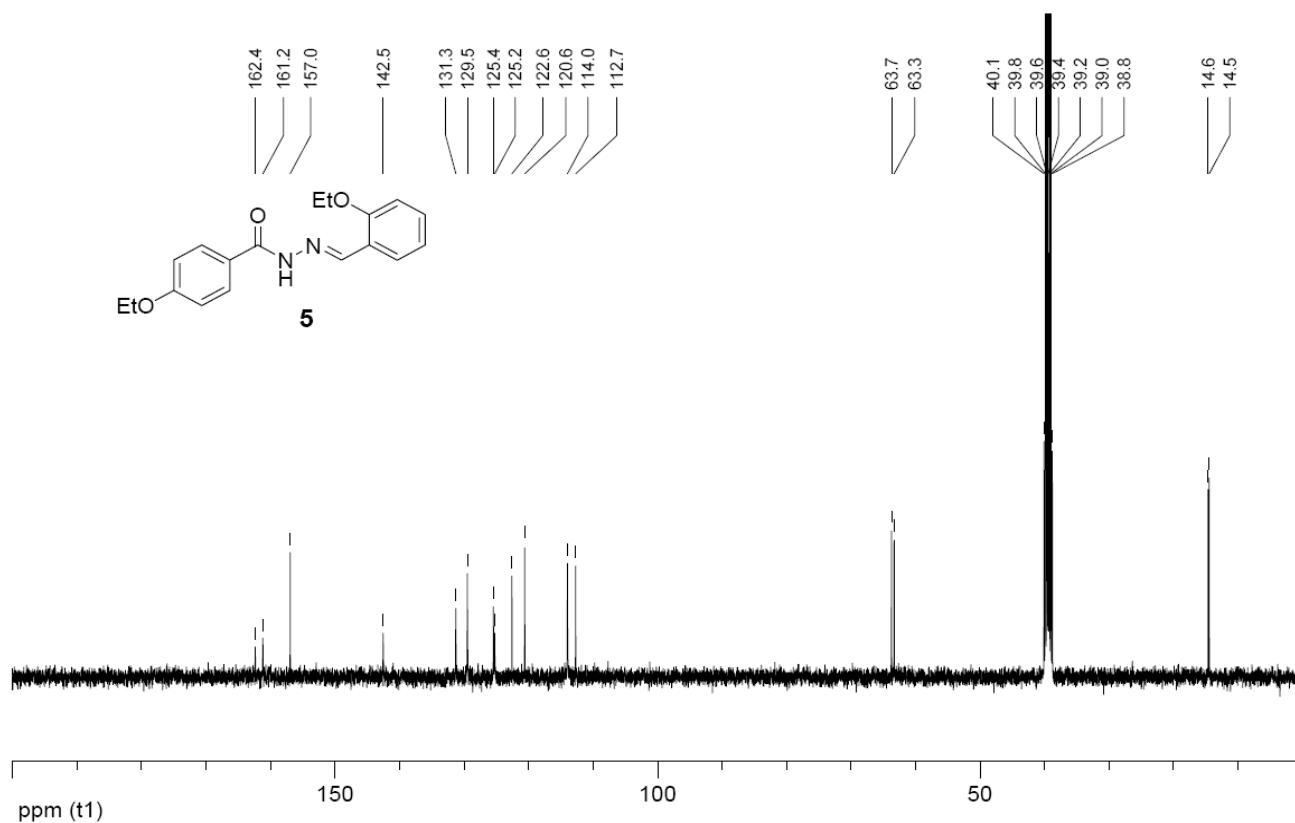

***N'*-(2-Propoxybenzylidene)-4-ethoxybenzohydrazide (6):**

<sup>1</sup>H NMR (400MHz, DMSO-*d*<sub>6</sub>)

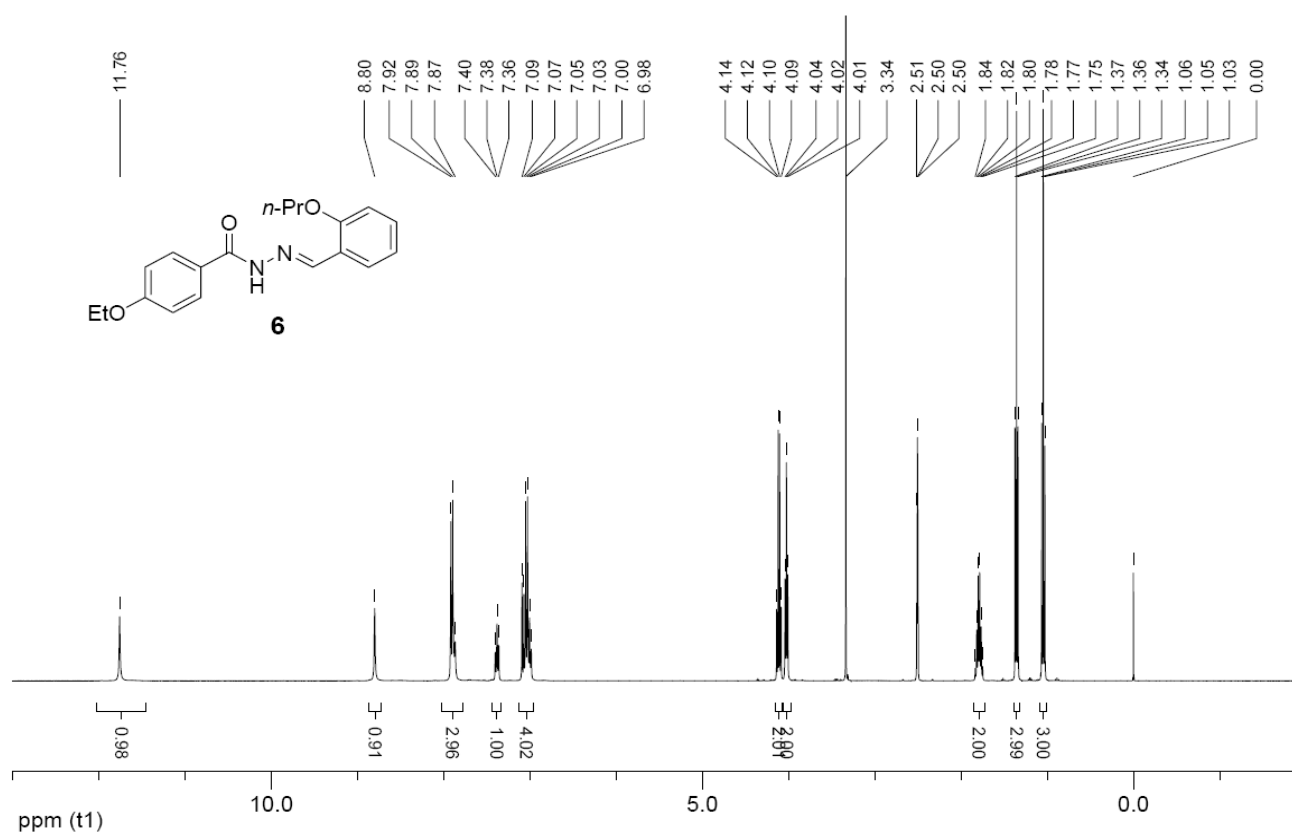

<sup>13</sup>C NMR (100MHz, DMSO-*d*<sub>6</sub>)

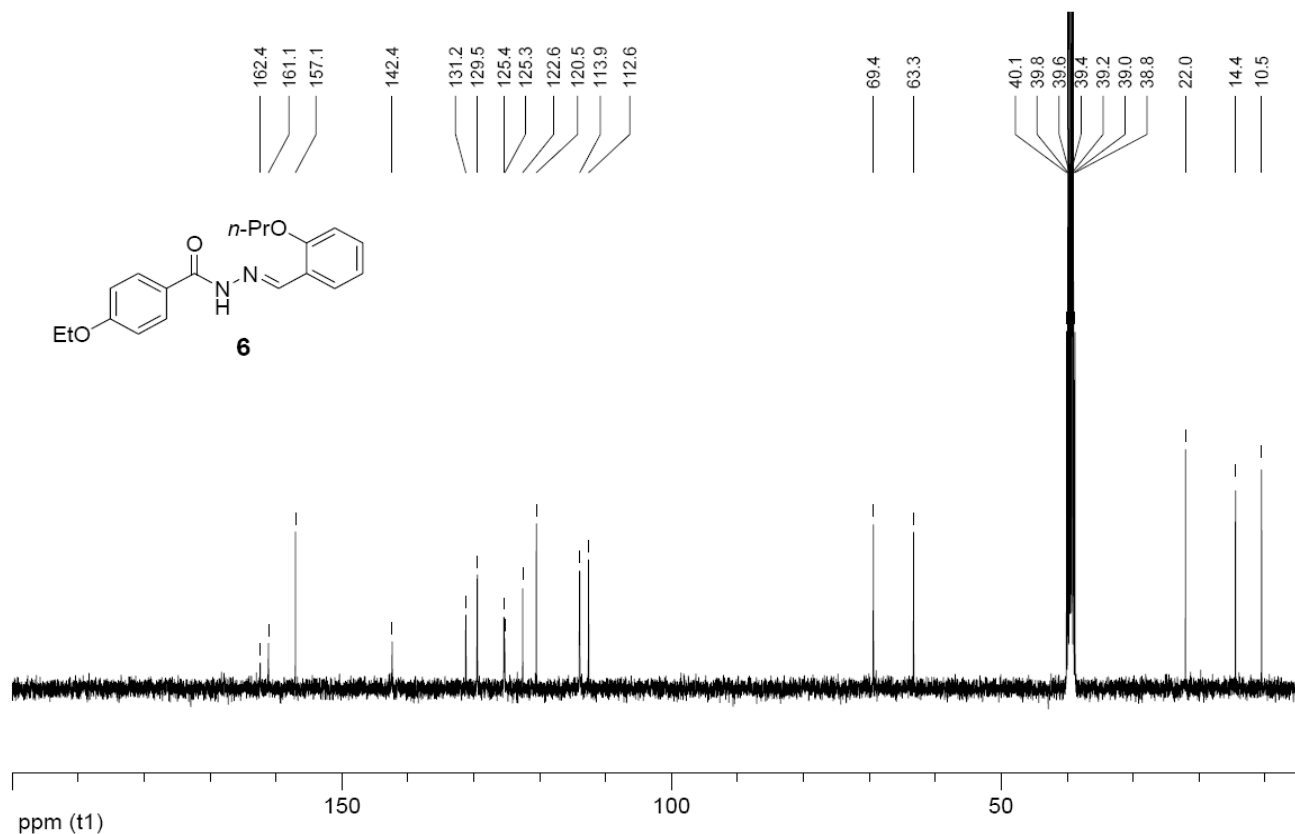

***N'*-(2-Isopropoxybenzylidene)-4-ethoxybenzohydrazide (7):**

<sup>1</sup>H NMR (400MHz, DMSO-*d*<sub>6</sub>)

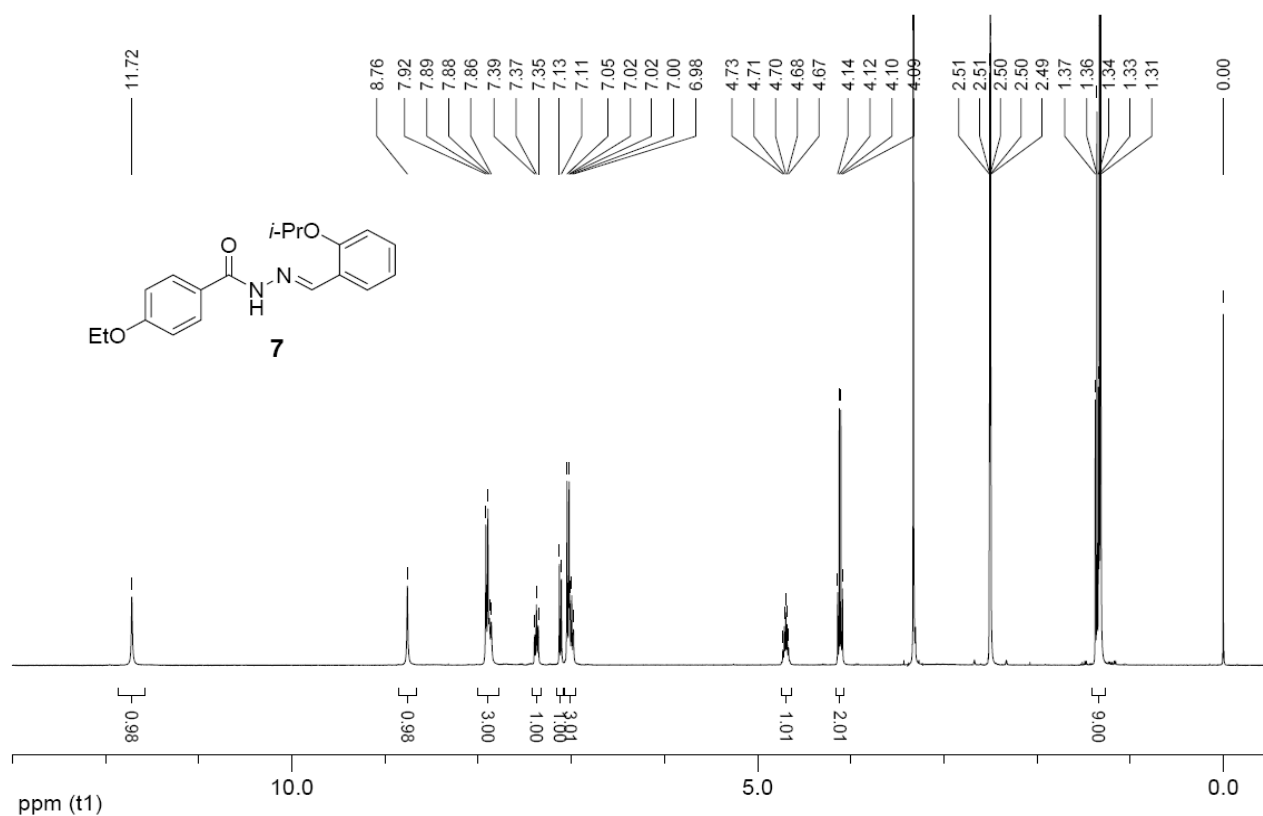

<sup>13</sup>C NMR (100MHz, DMSO-*d*<sub>6</sub>)

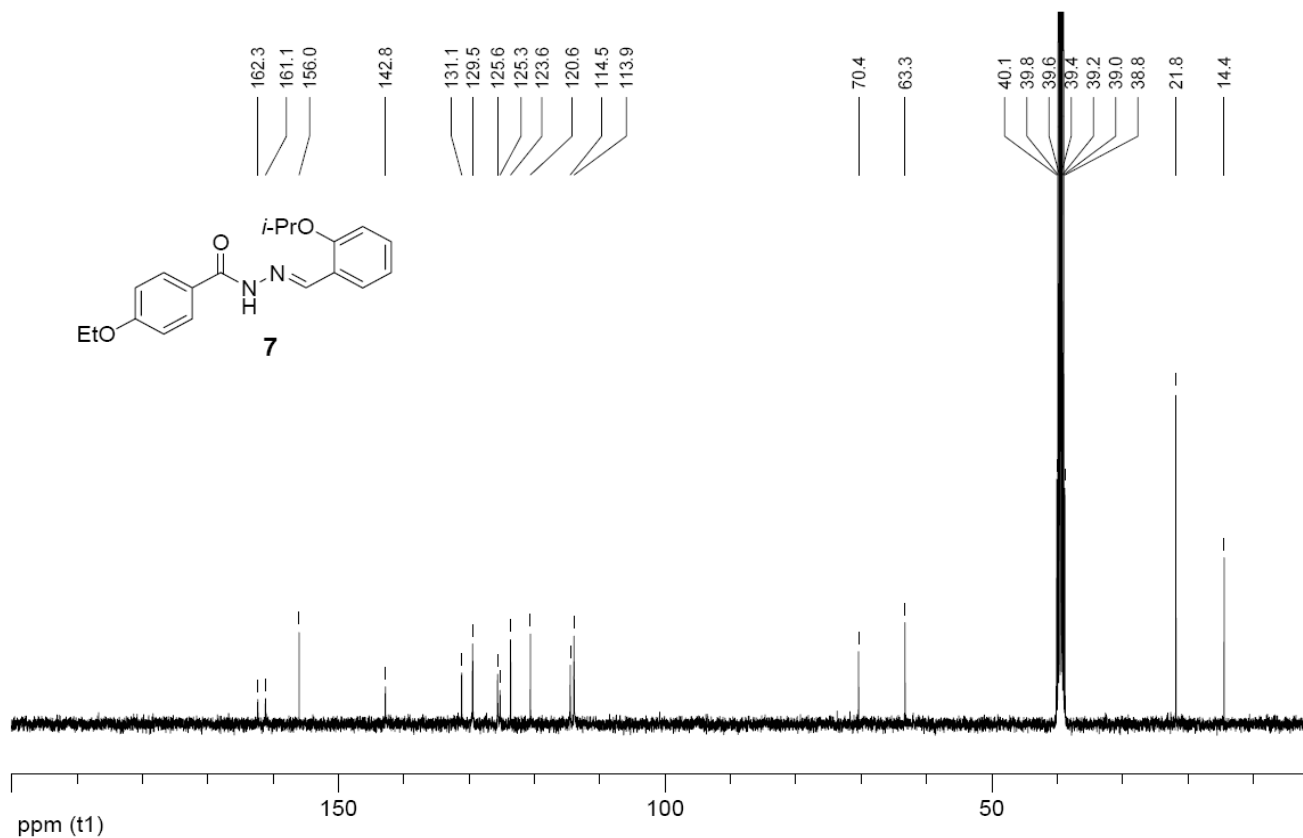

**4-Ethoxy-*N'*-(thiophen-2-ylmethylene)benzohydrazide (8) :**

<sup>1</sup>H NMR (400MHz, DMSO-*d*<sub>6</sub>)

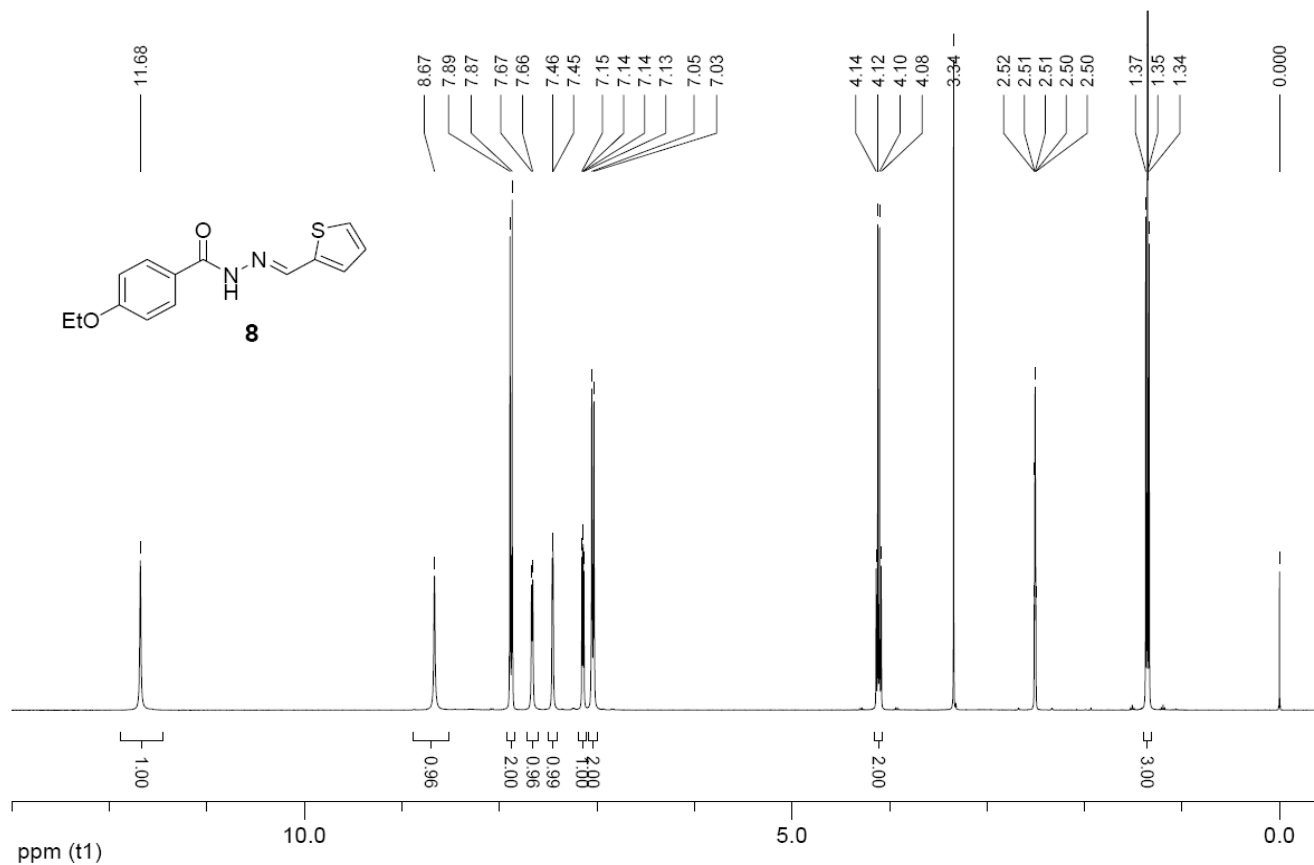

<sup>13</sup>C NMR (100MHz, DMSO-*d*<sub>6</sub>)

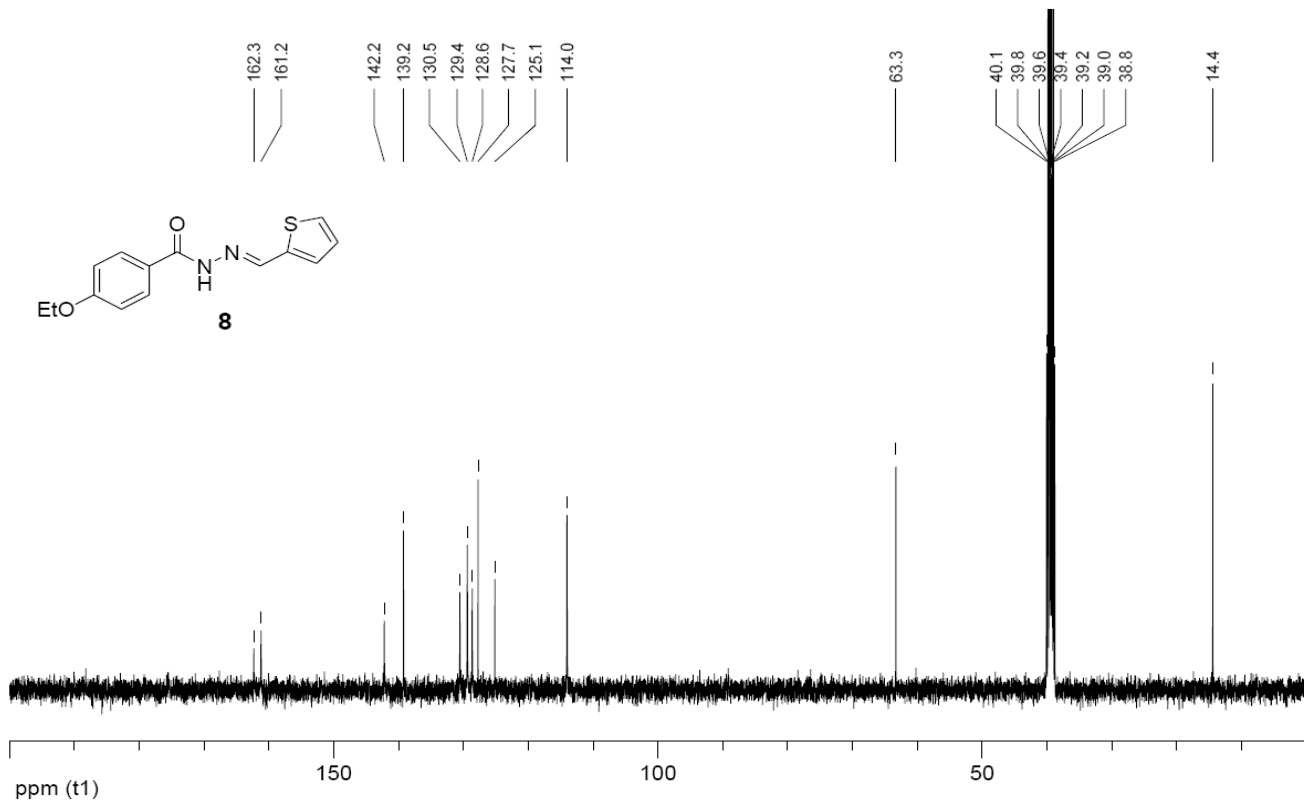



***N'*-Benzylidene-4-ethoxybenzohydrazide (9):**

<sup>1</sup>H NMR (400MHz, DMSO-*d*<sub>6</sub>)

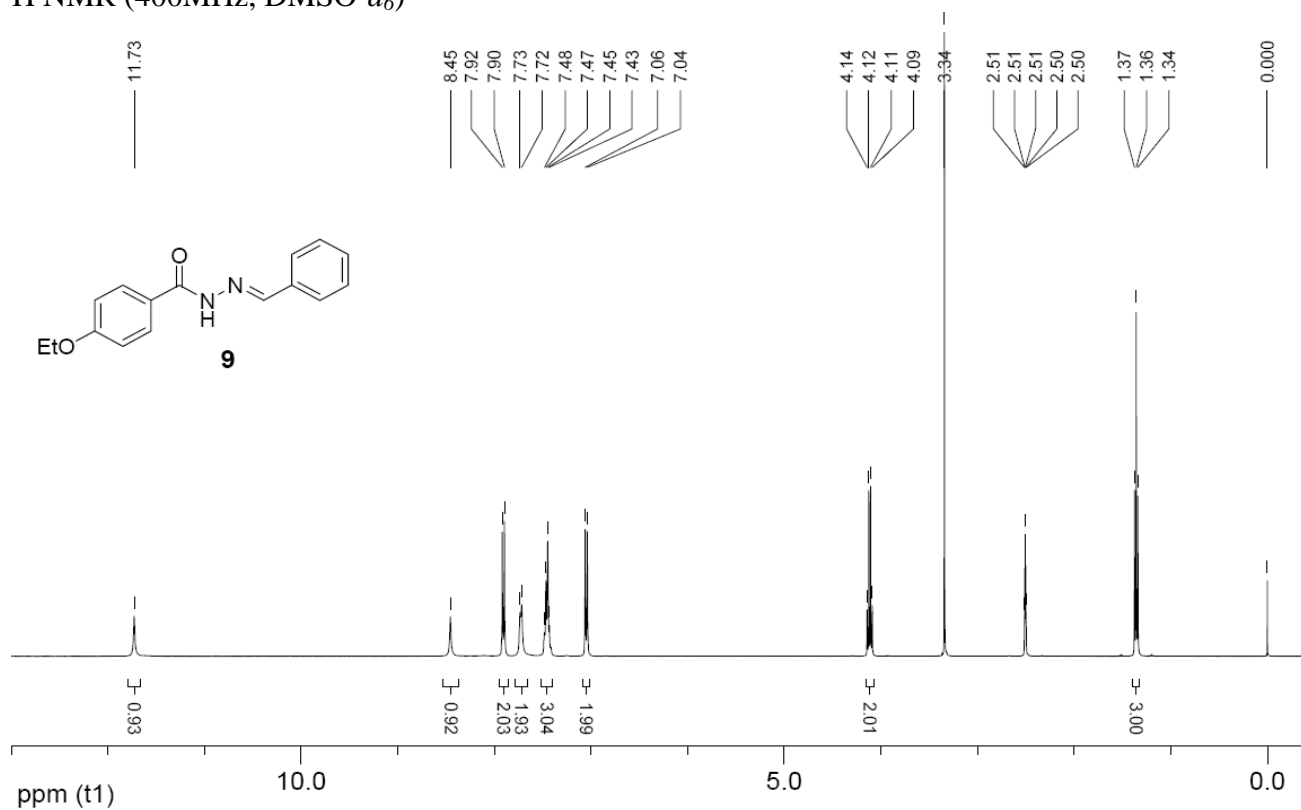

<sup>13</sup>C NMR (100MHz, DMSO-*d*<sub>6</sub>)

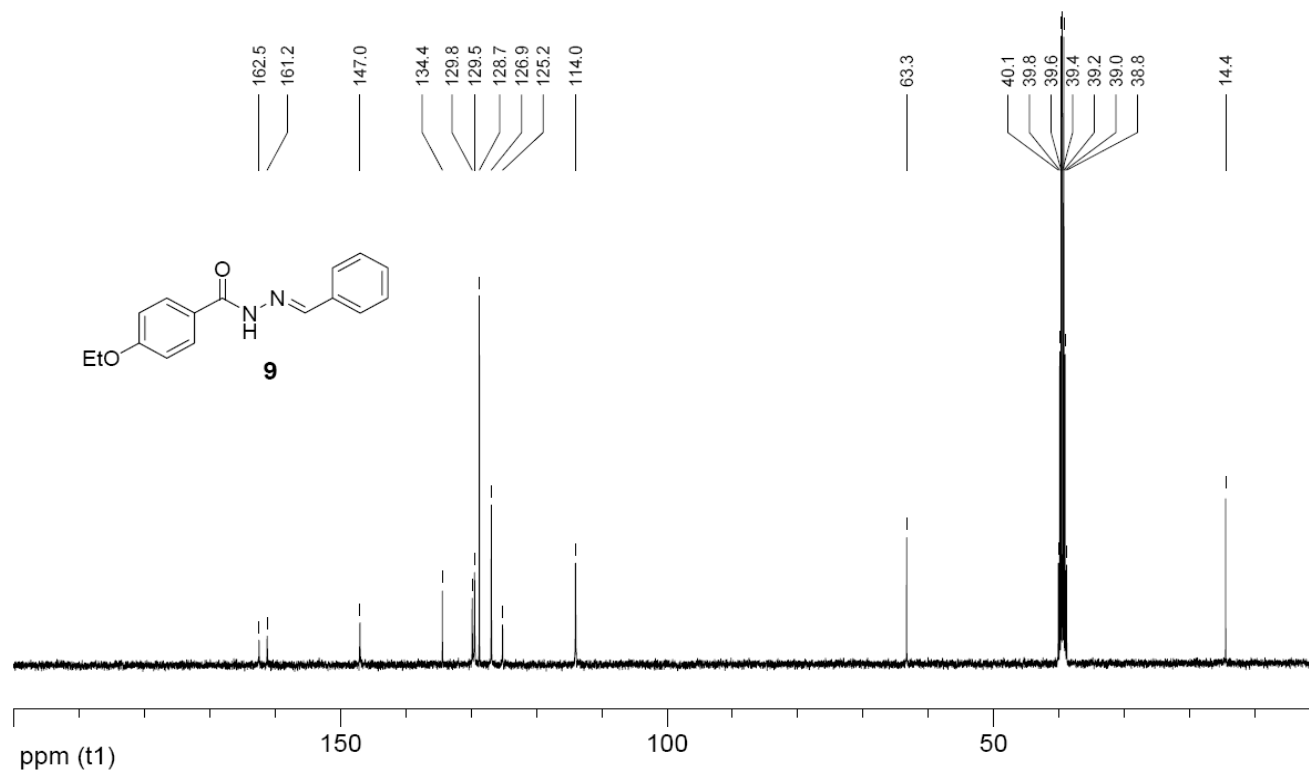

**4-Ethoxy-*N'*-(2-methylpropylidene)benzohydrazide(10):**

<sup>1</sup>H NMR (400MHz, CD<sub>3</sub>CN)

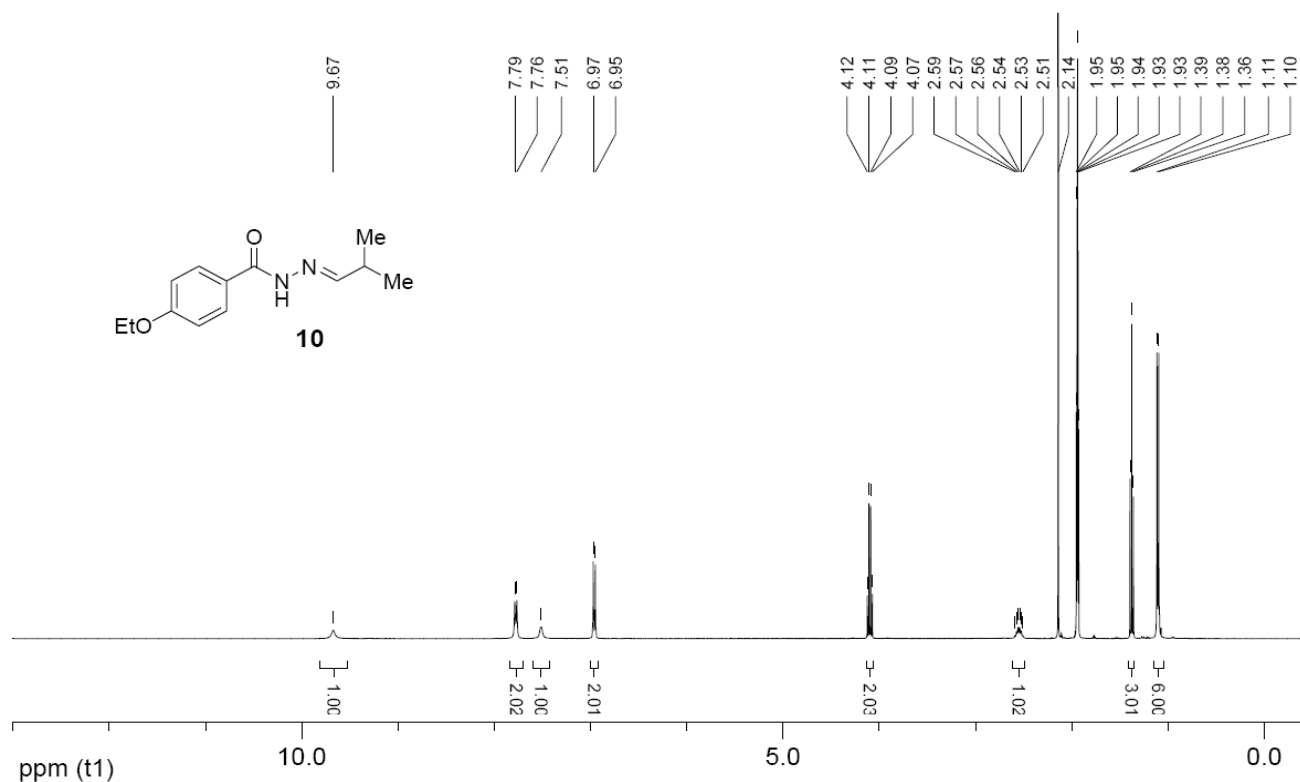

<sup>13</sup>C NMR (400MHz, DMSO-*d*<sub>6</sub>)

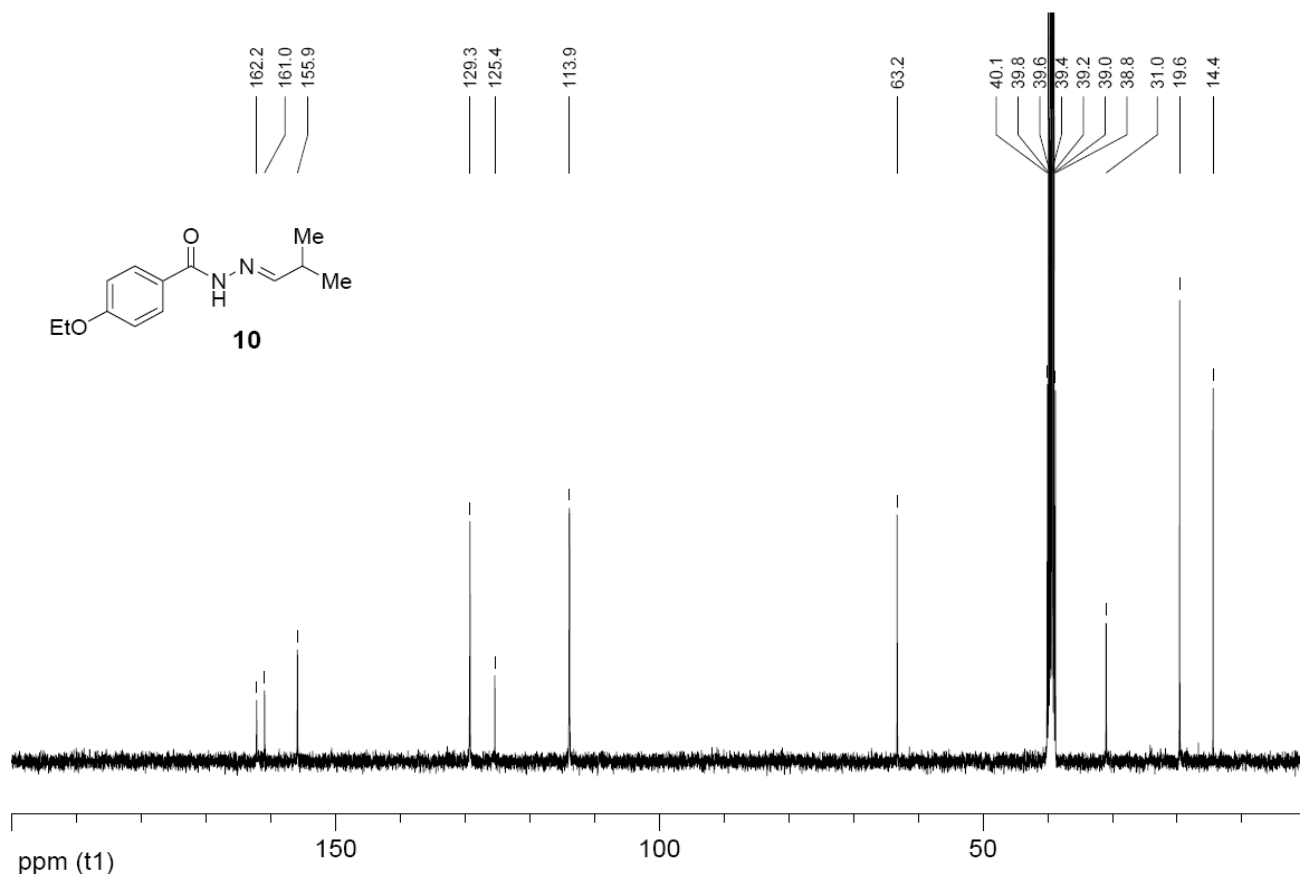

**4-Penyl-*N'*-(2-methoxybenzylidene)benzohydrazide (11):**

<sup>1</sup>H NMR (400MHz, DMSO-*d*<sub>6</sub>)

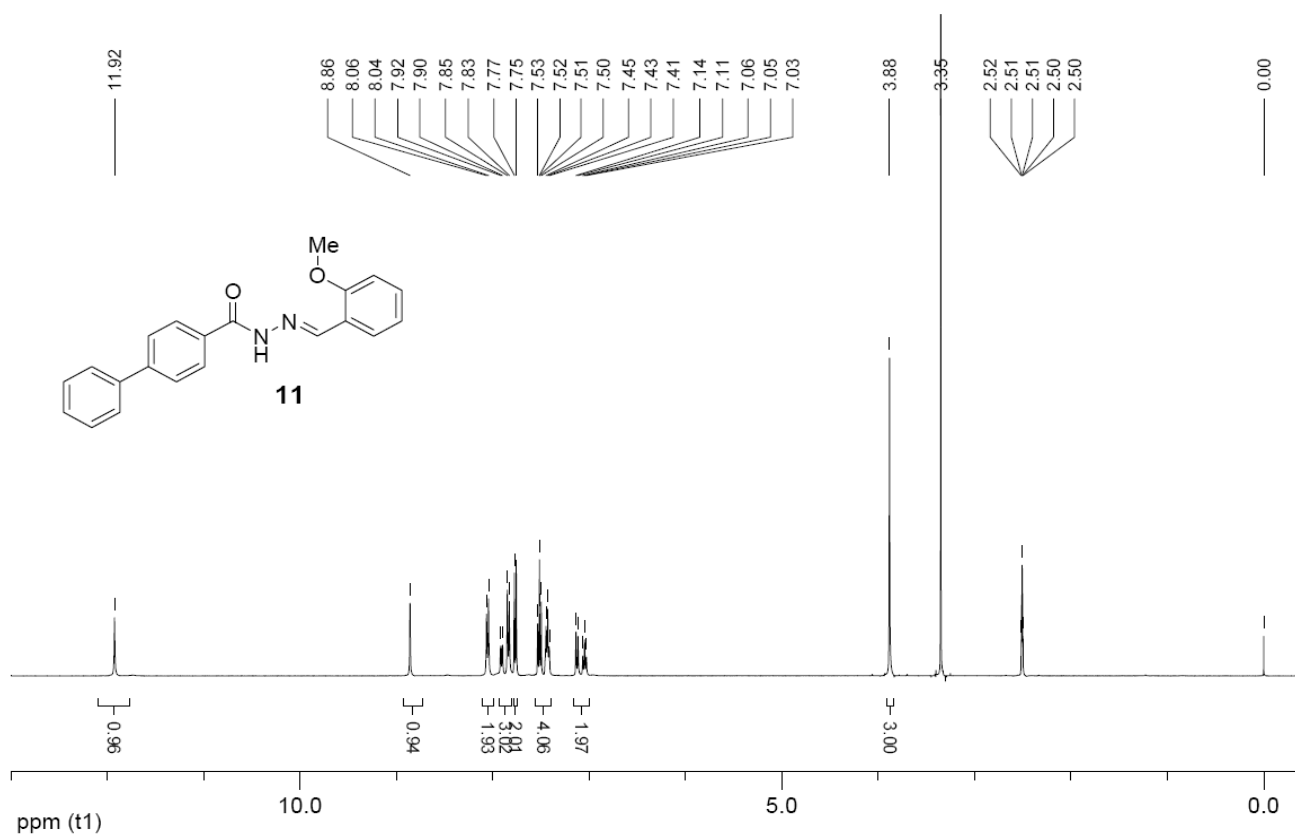

<sup>13</sup>C NMR (100MHz, DMSO-*d*<sub>6</sub>)

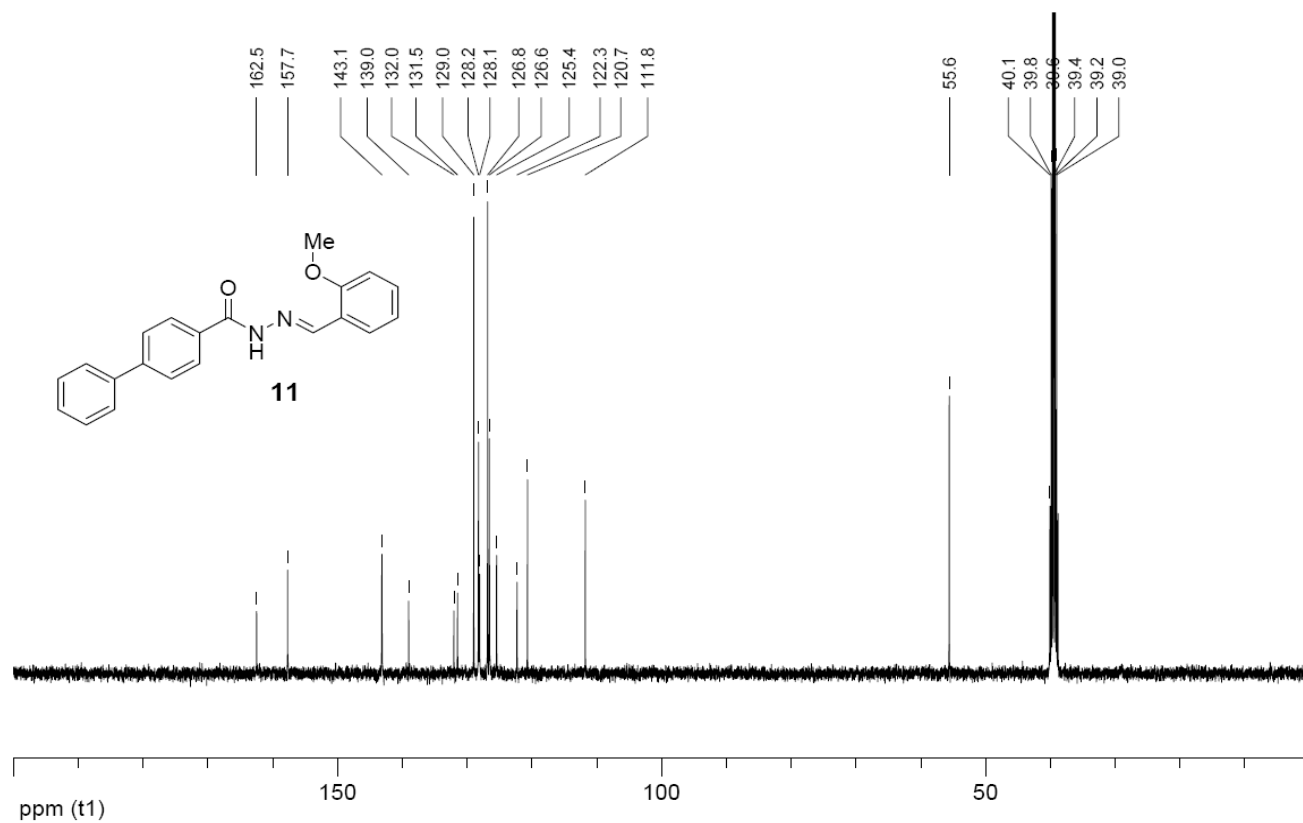

***N'*-(2-Methoxybenzylidene)-2-naphthohydrazide (12):**

<sup>1</sup>H NMR (400MHz, DMSO-*d*<sub>6</sub>)

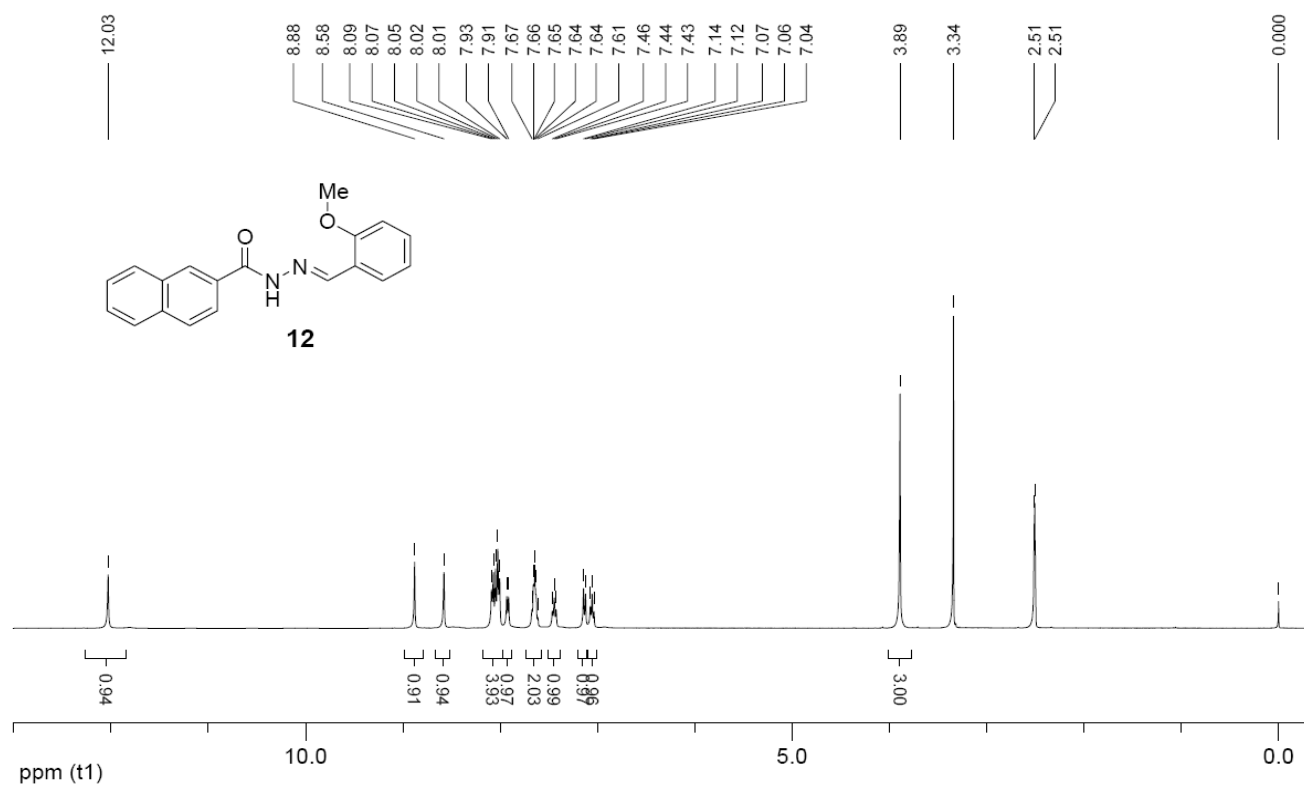

<sup>13</sup>C NMR (100MHz, DMSO-*d*<sub>6</sub>)

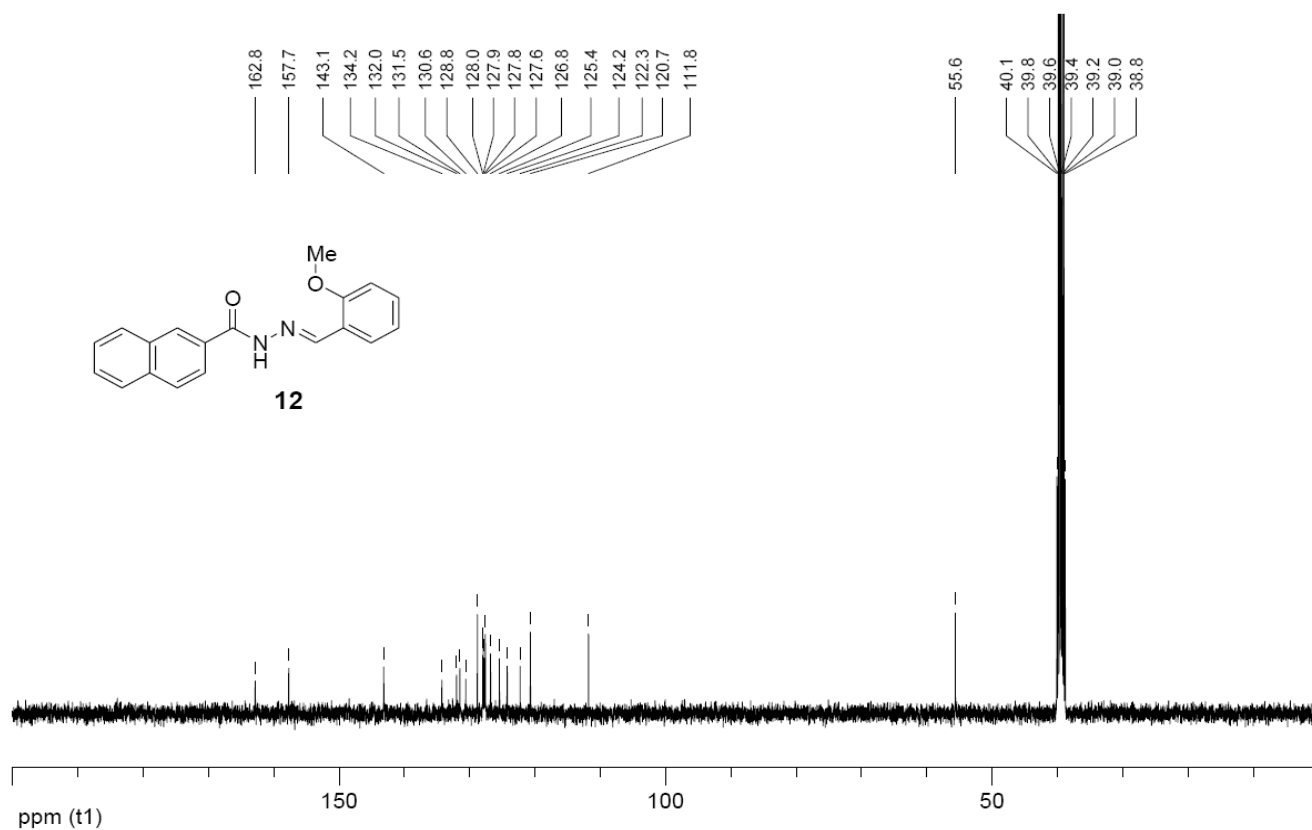

**2-(4-Ethoxyphenyl)-5-furan-2-yl-1,3,4-oxadiazole (13a):**

<sup>1</sup>H NMR (400MHz, DMSO-*d*<sub>6</sub>)

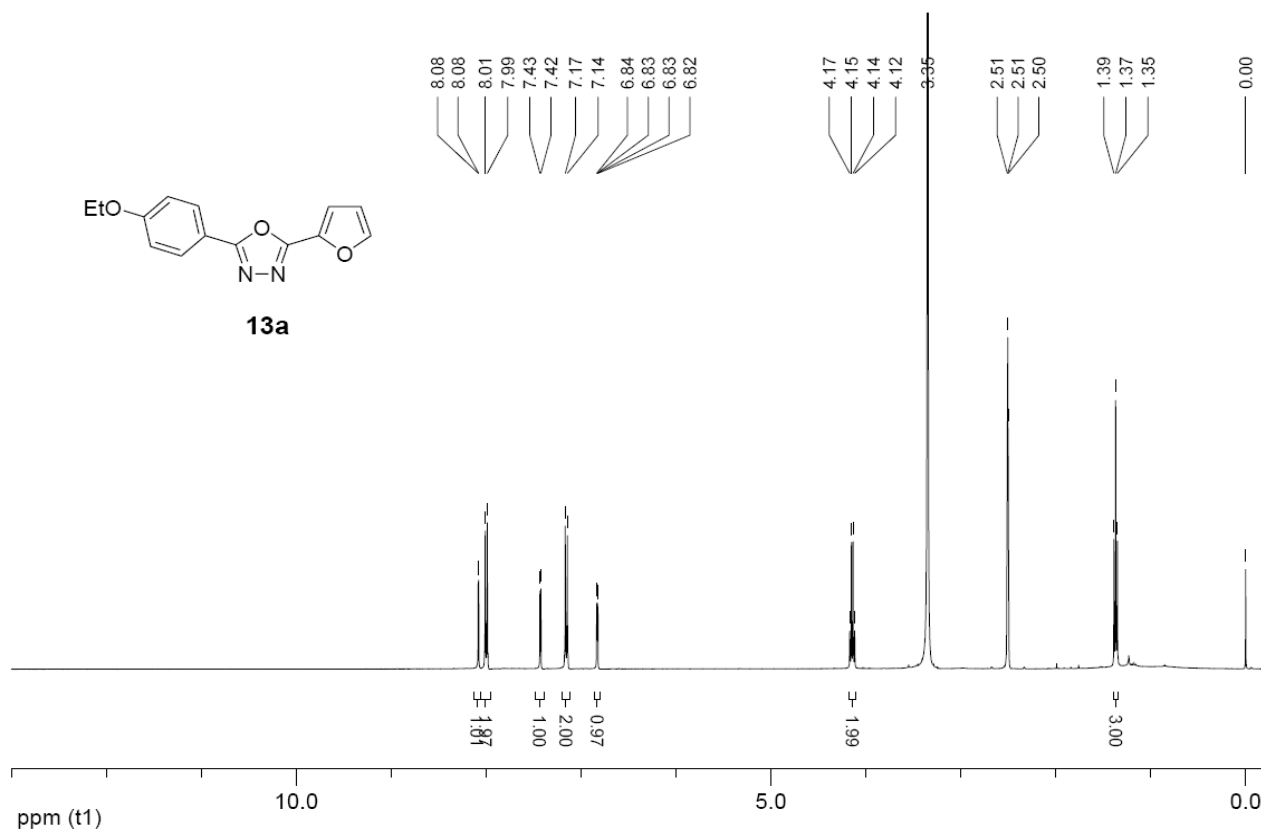

<sup>13</sup>C NMR (100MHz, DMSO-*d*<sub>6</sub>)

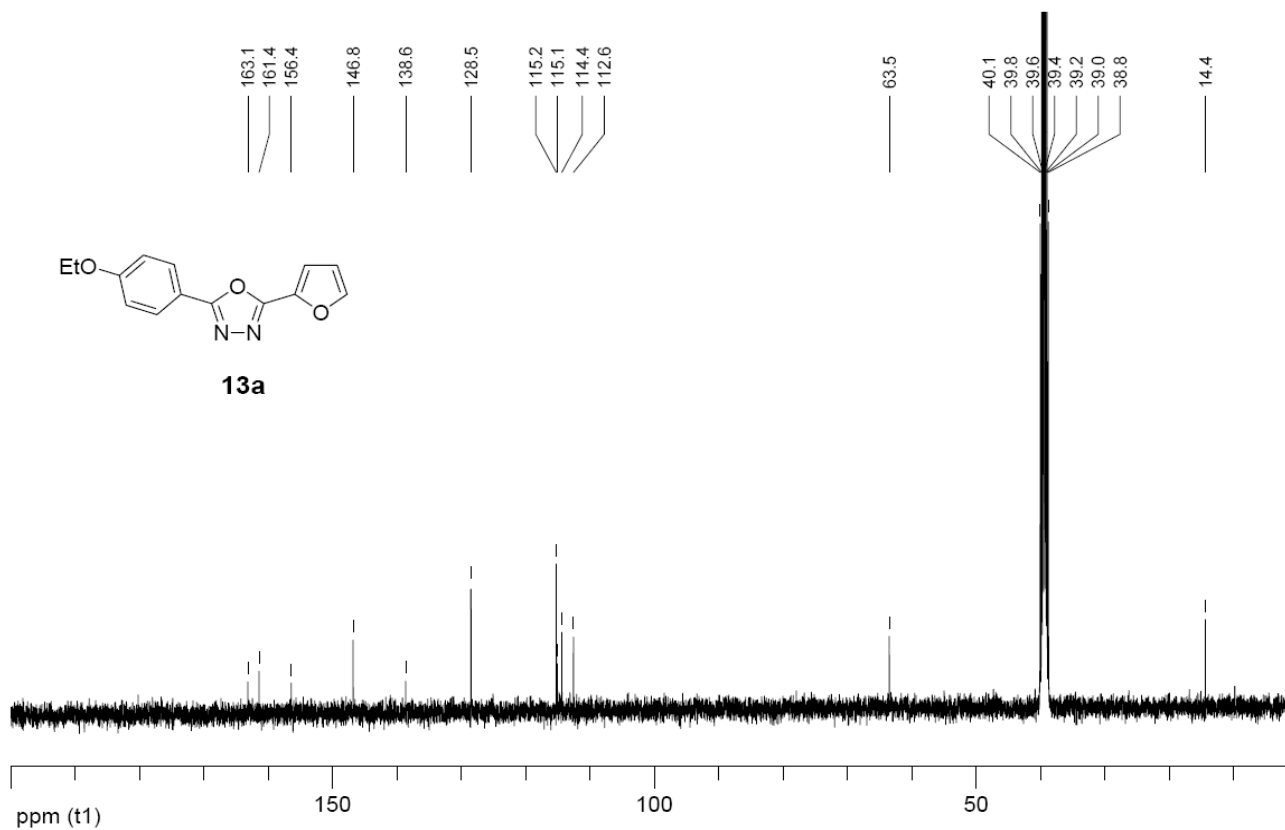

**2-Furan-2-yl-5-*p*-tolyl-1,3,4-oxadiazole (13b):**

<sup>1</sup>H NMR (400MHz, CDCl<sub>3</sub>)

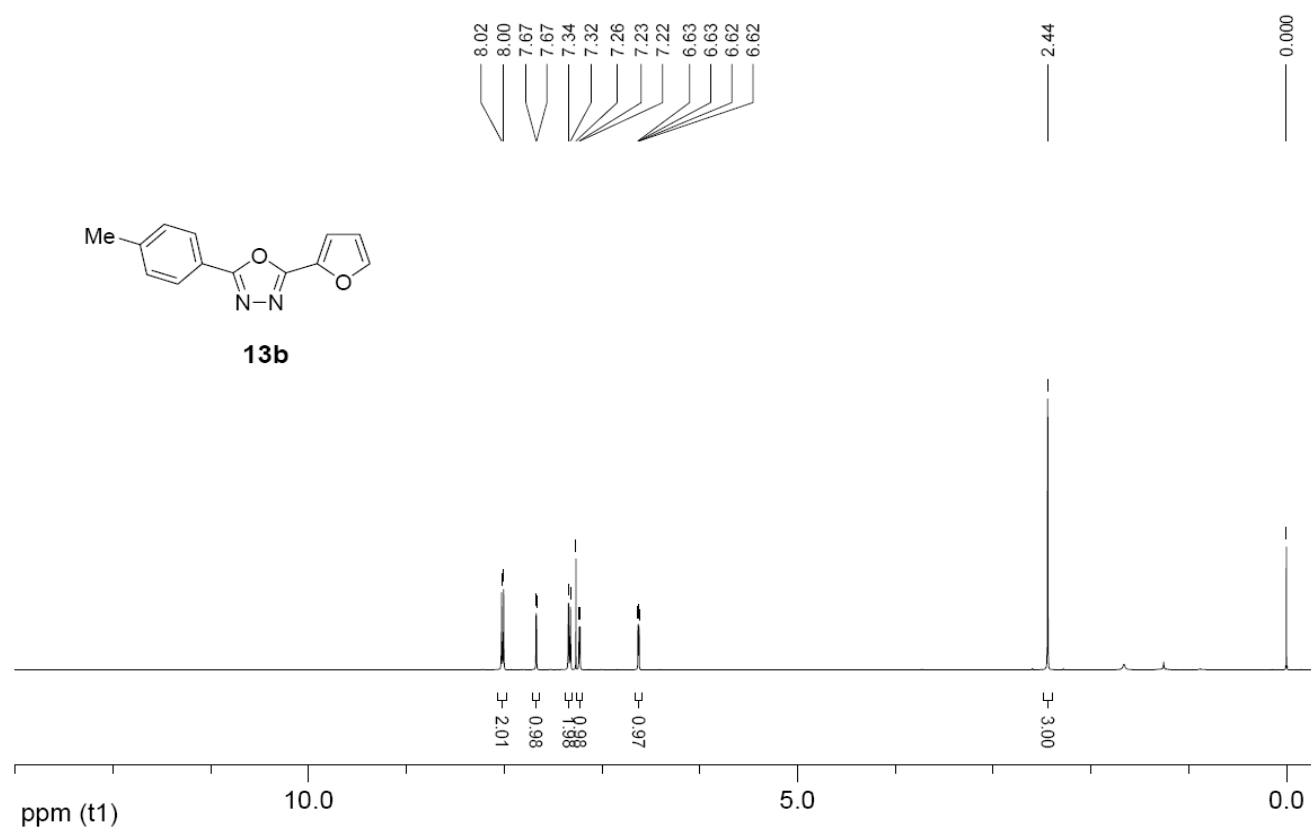

<sup>13</sup>C NMR (100MHz, CDCl<sub>3</sub>)

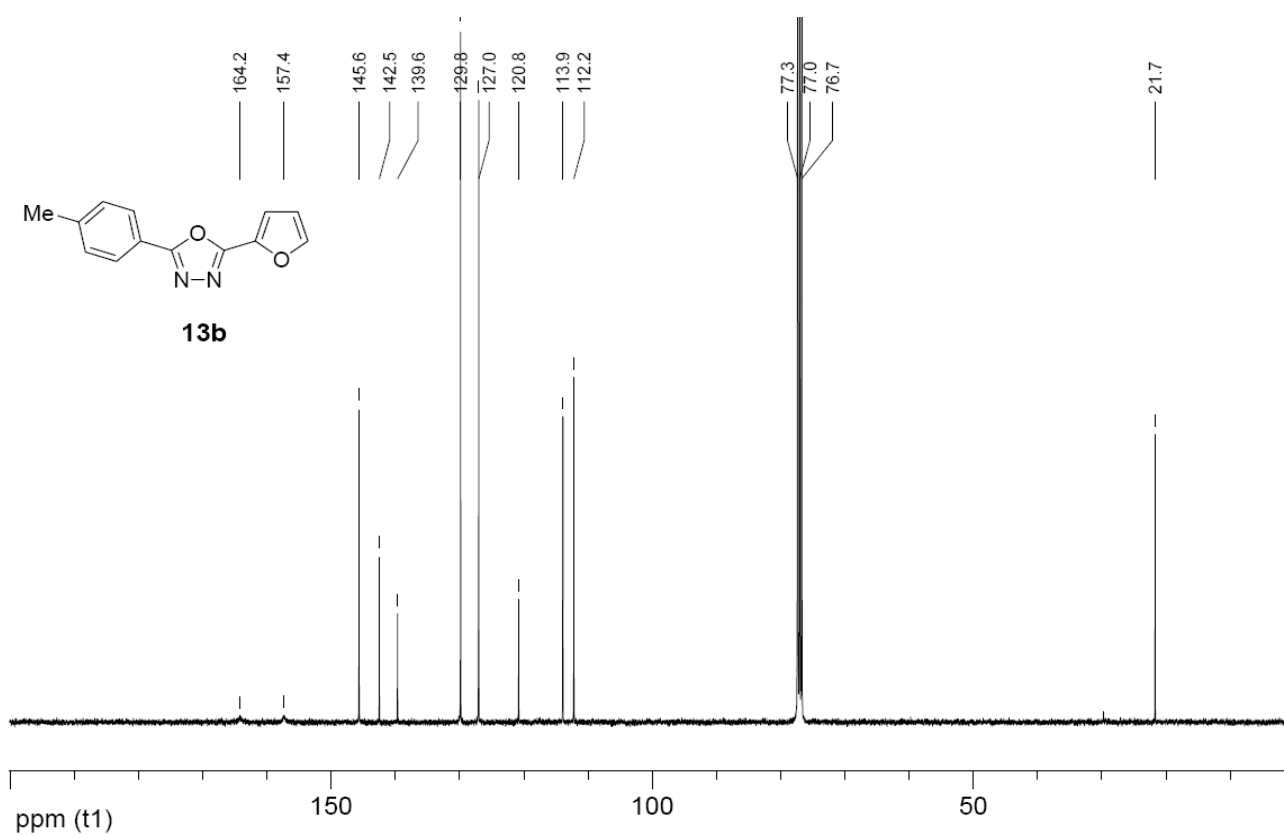

**2-Furan-2-yl-5-phenyl-1,3,4-oxadiazole (13c):**

<sup>1</sup>H NMR (400MHz, CDCl<sub>3</sub>)

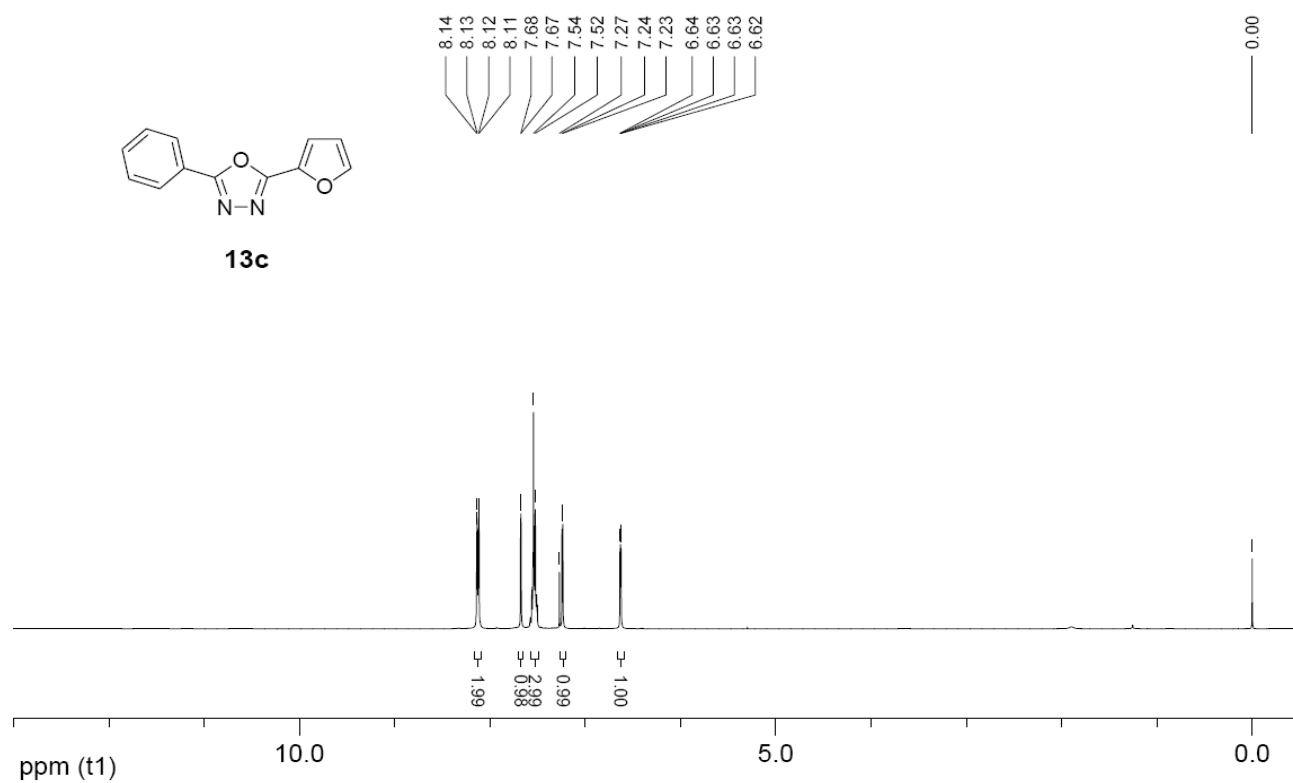

<sup>13</sup>C NMR (100MHz, CDCl<sub>3</sub>)

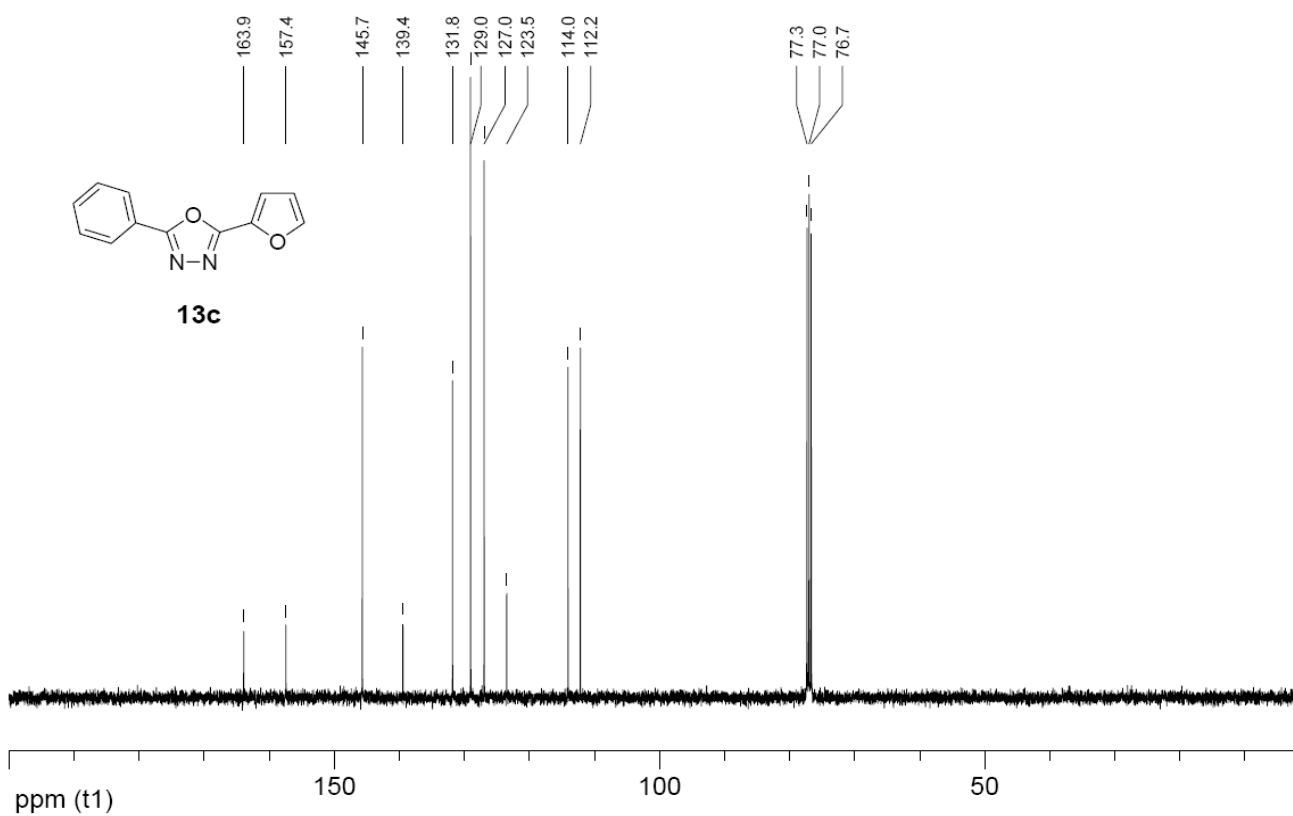

**2-(4-Chlorophenyl)-5-furan-2-yl-1,3,4-oxadiazole (13d):**

<sup>1</sup>H NMR (400MHz, CDCl<sub>3</sub>)

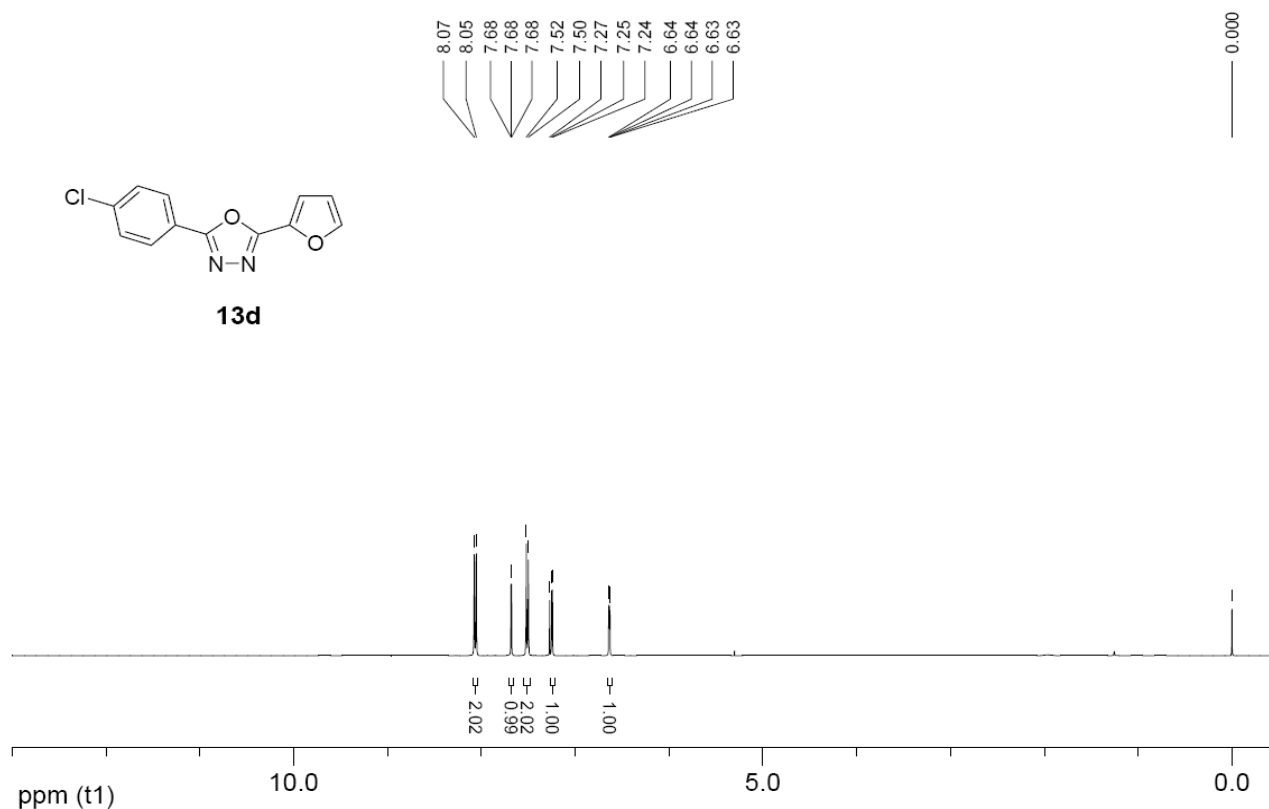

<sup>13</sup>C NMR (100MHz, CDCl<sub>3</sub>)

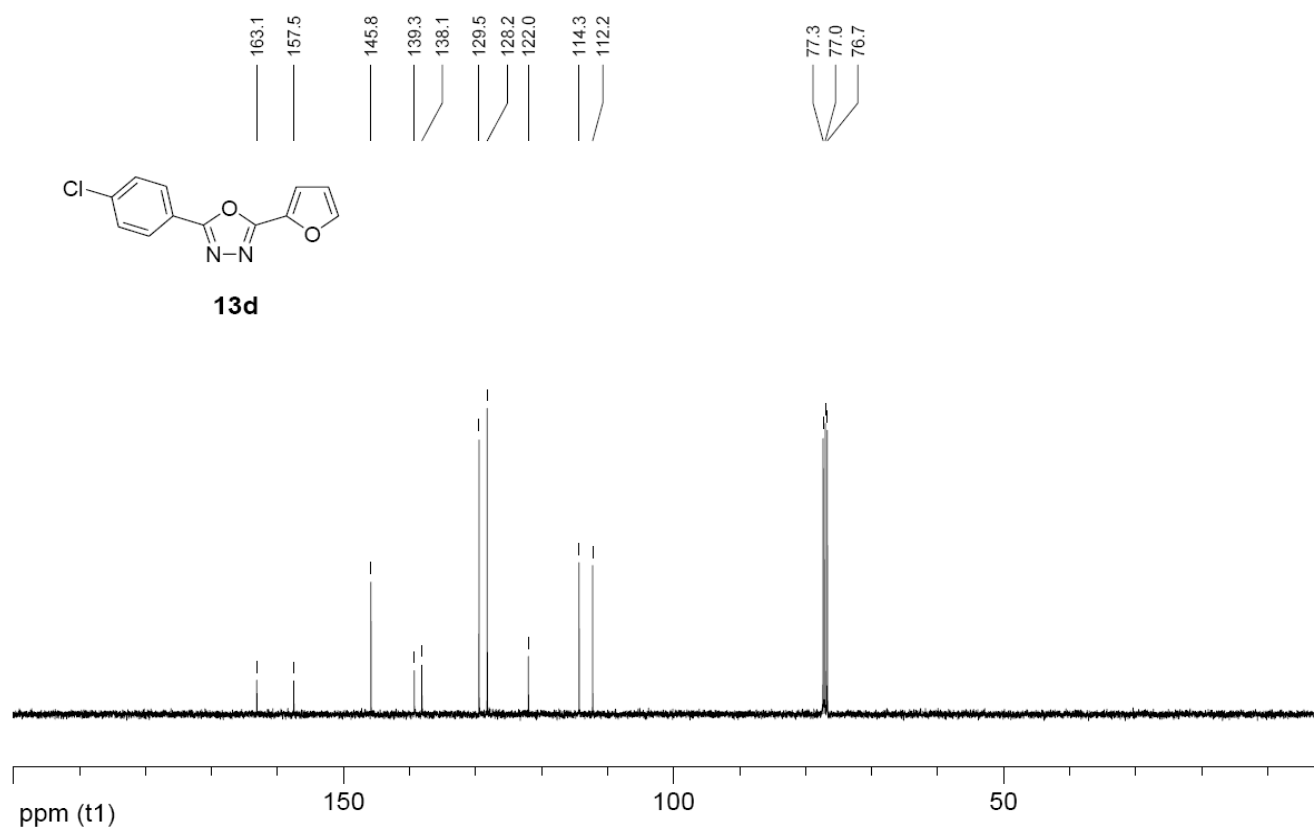

Supplement: b811612a.pdf [file b811612a.pdf]
